# Supplementary material
Source: PubMed Central journal article supplement (PMC3196889)

Figure S1  
A 1p11

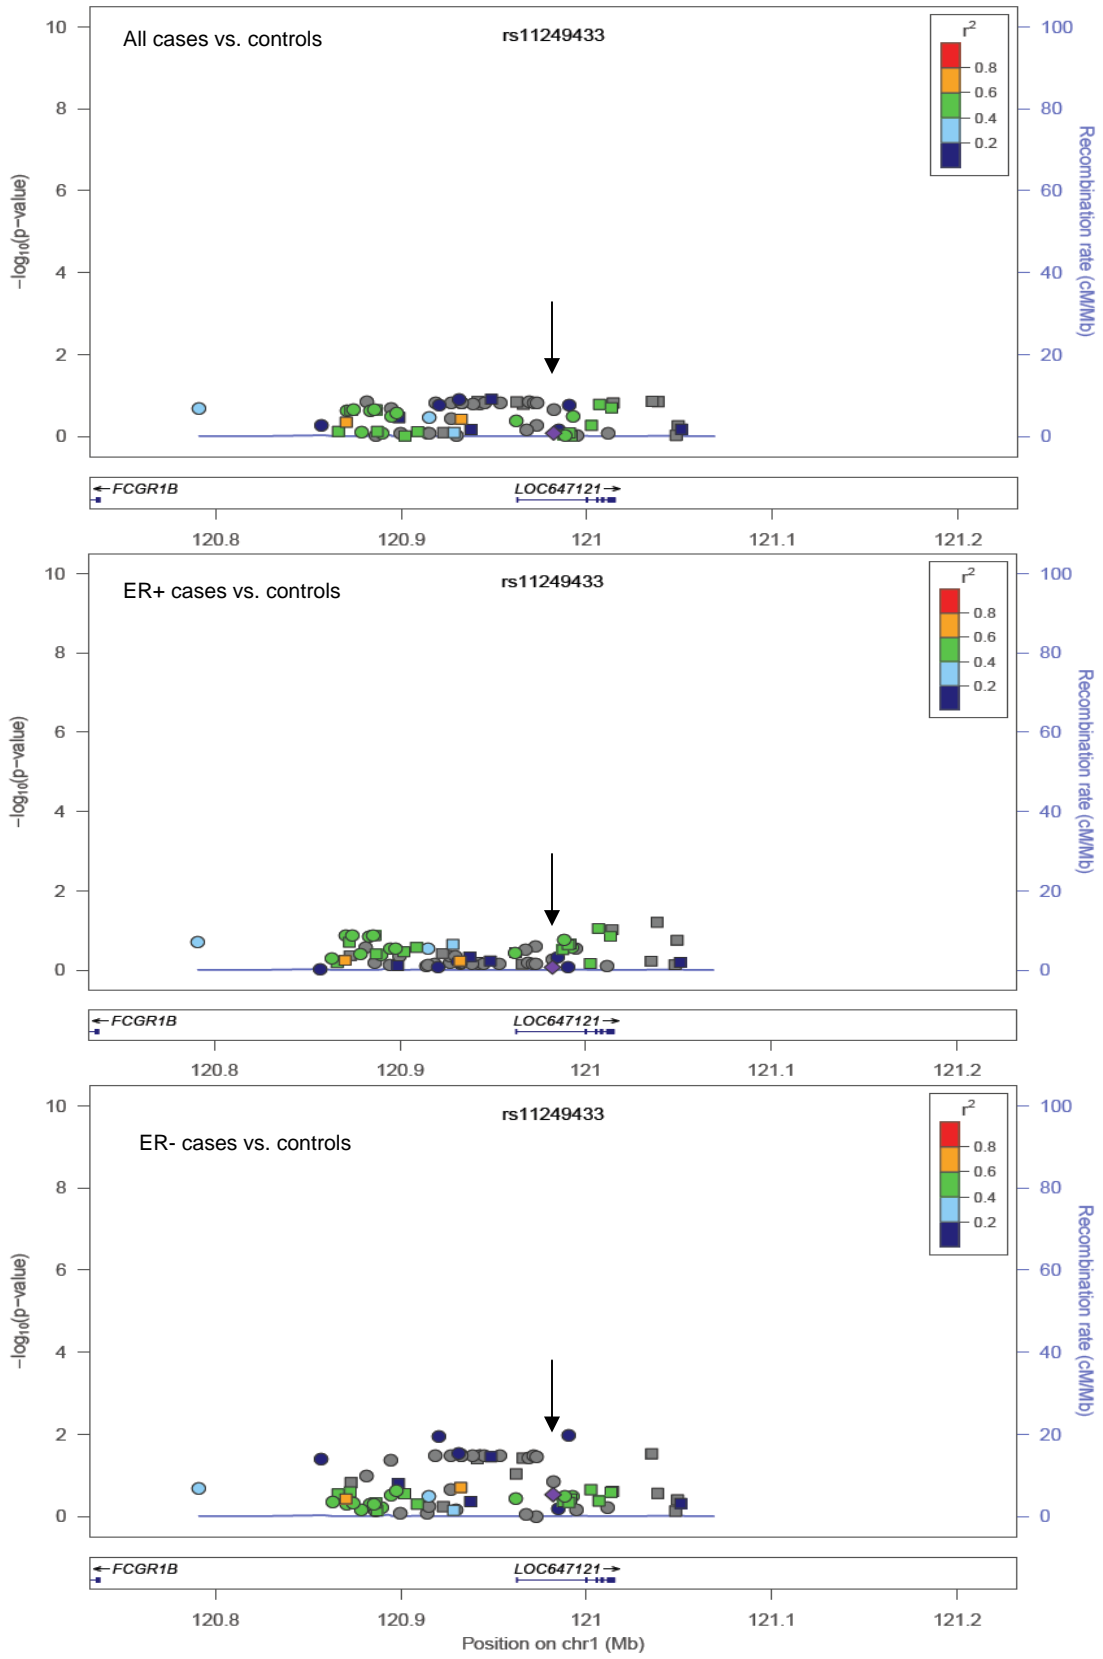

B 2q35

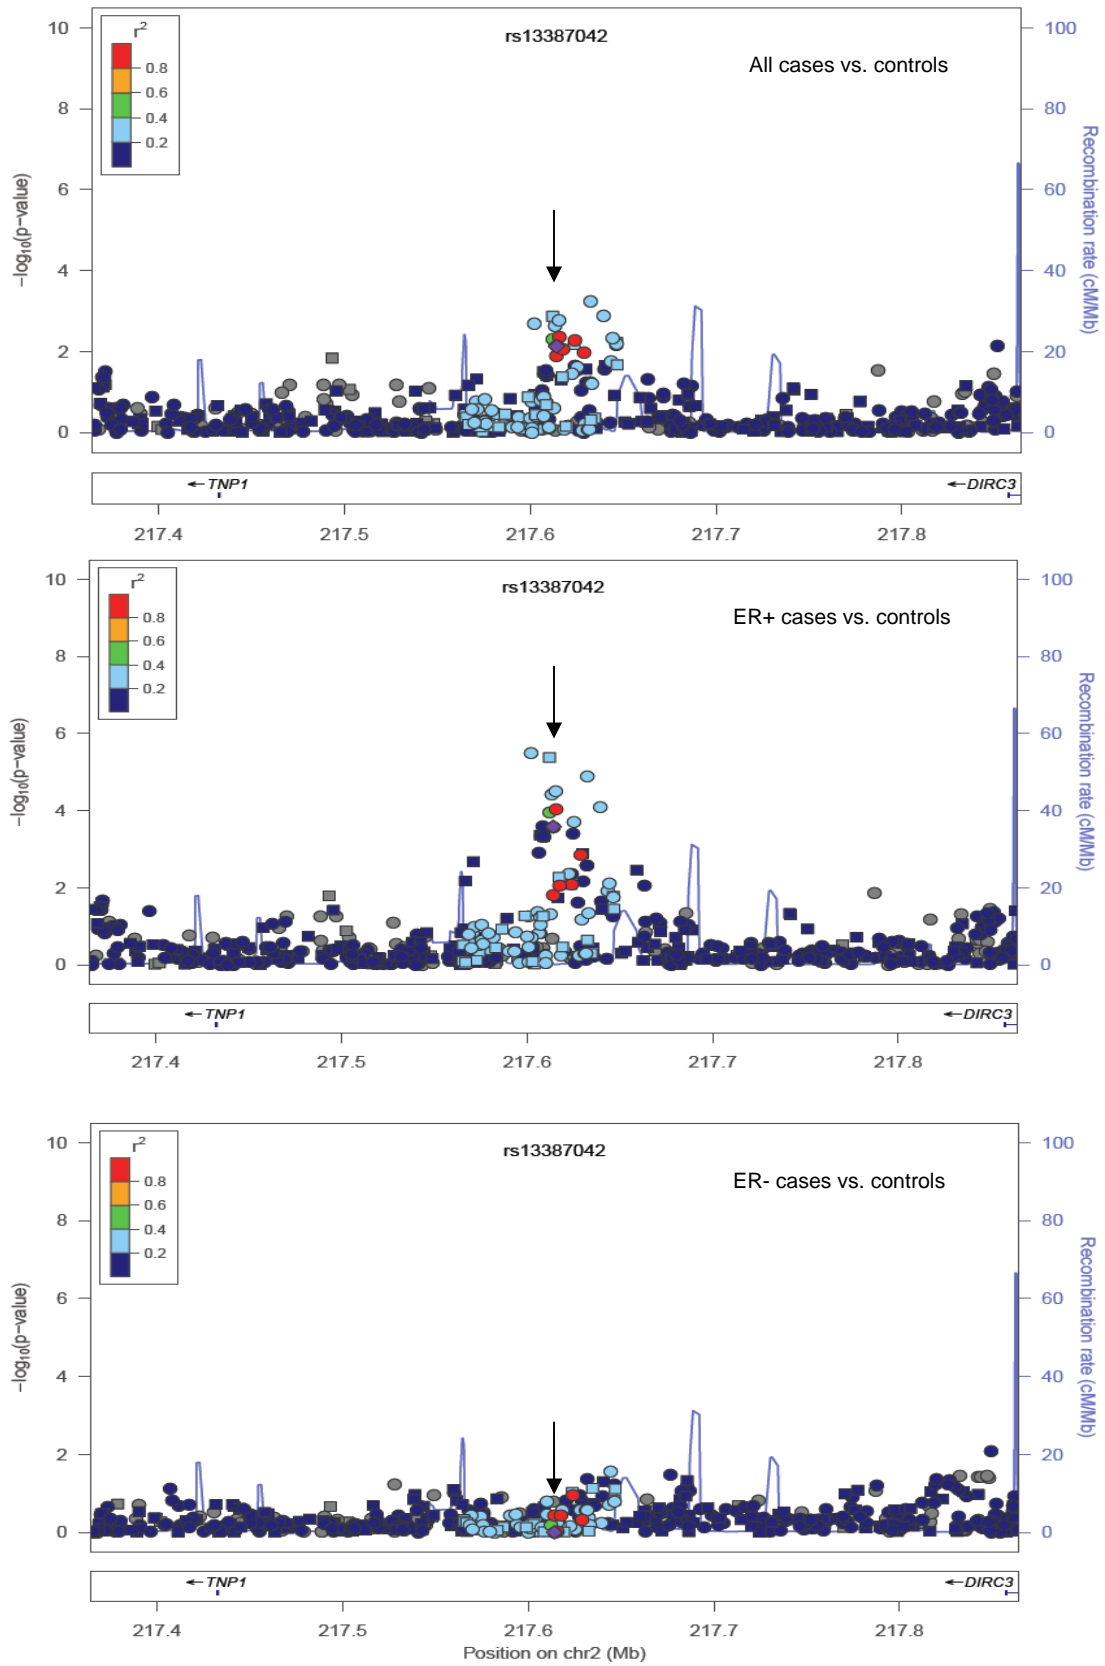

C 3p24

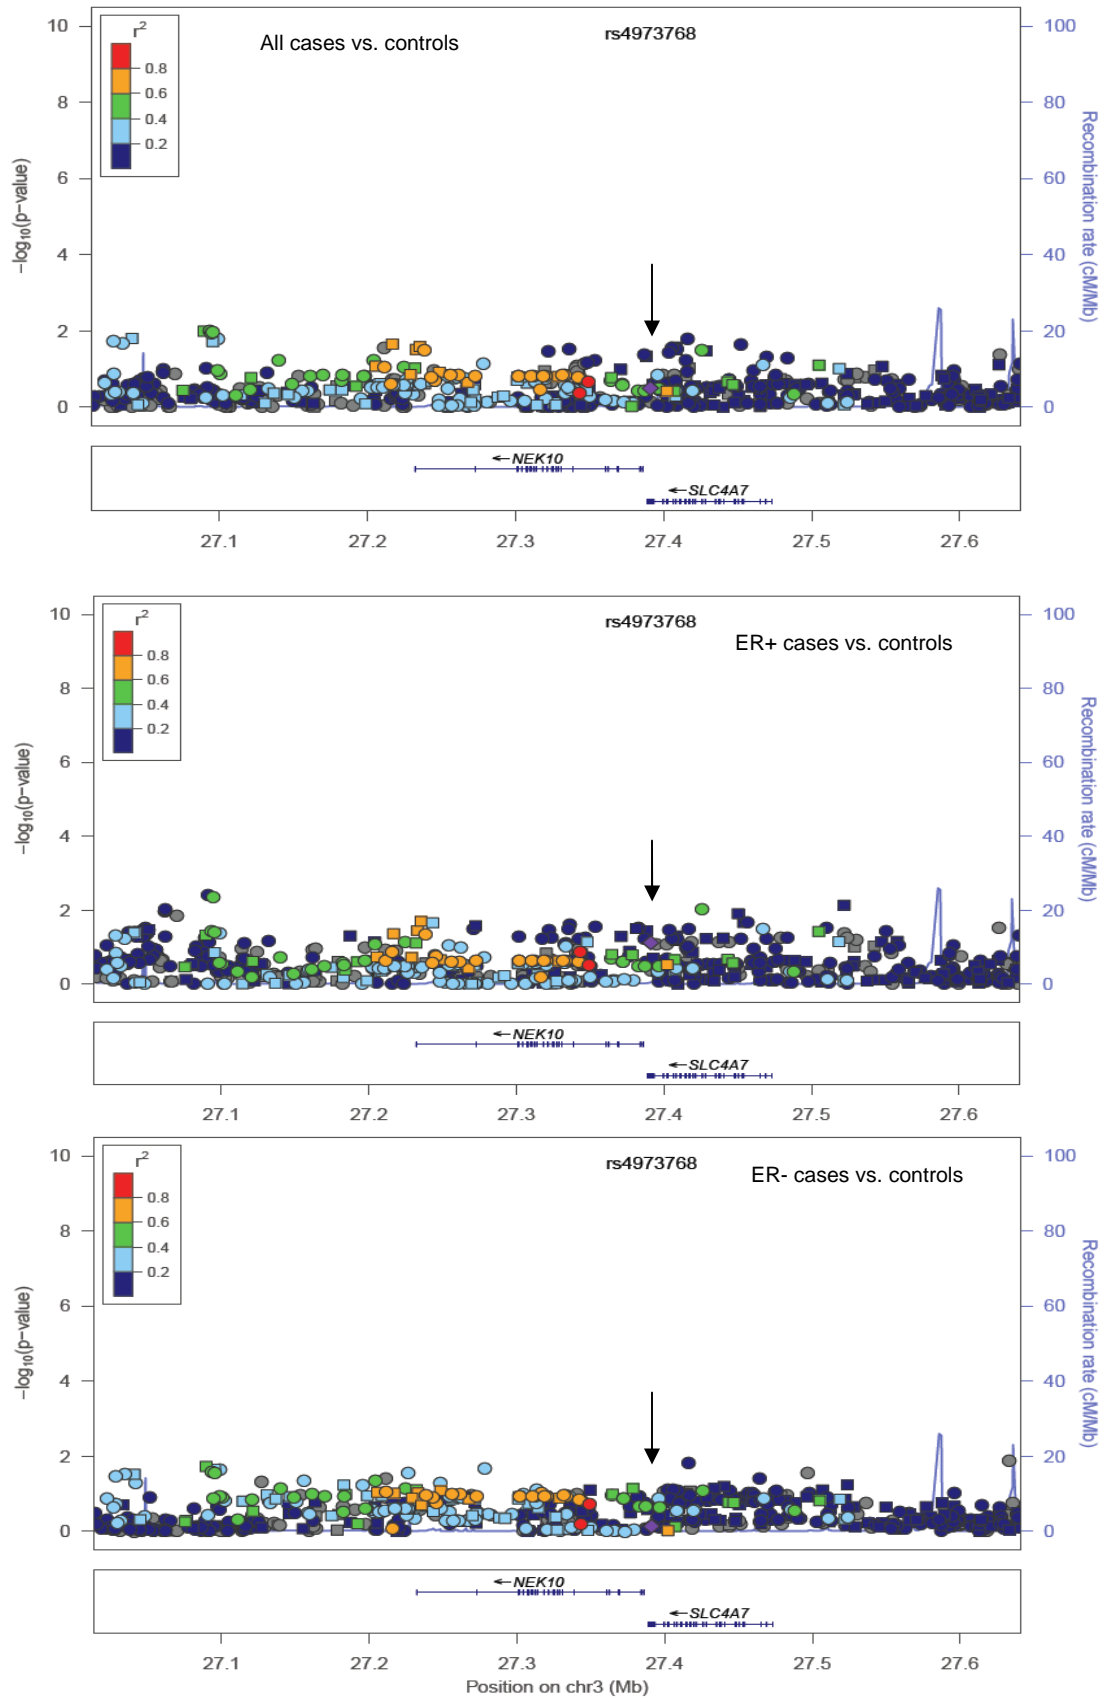

D 5p12

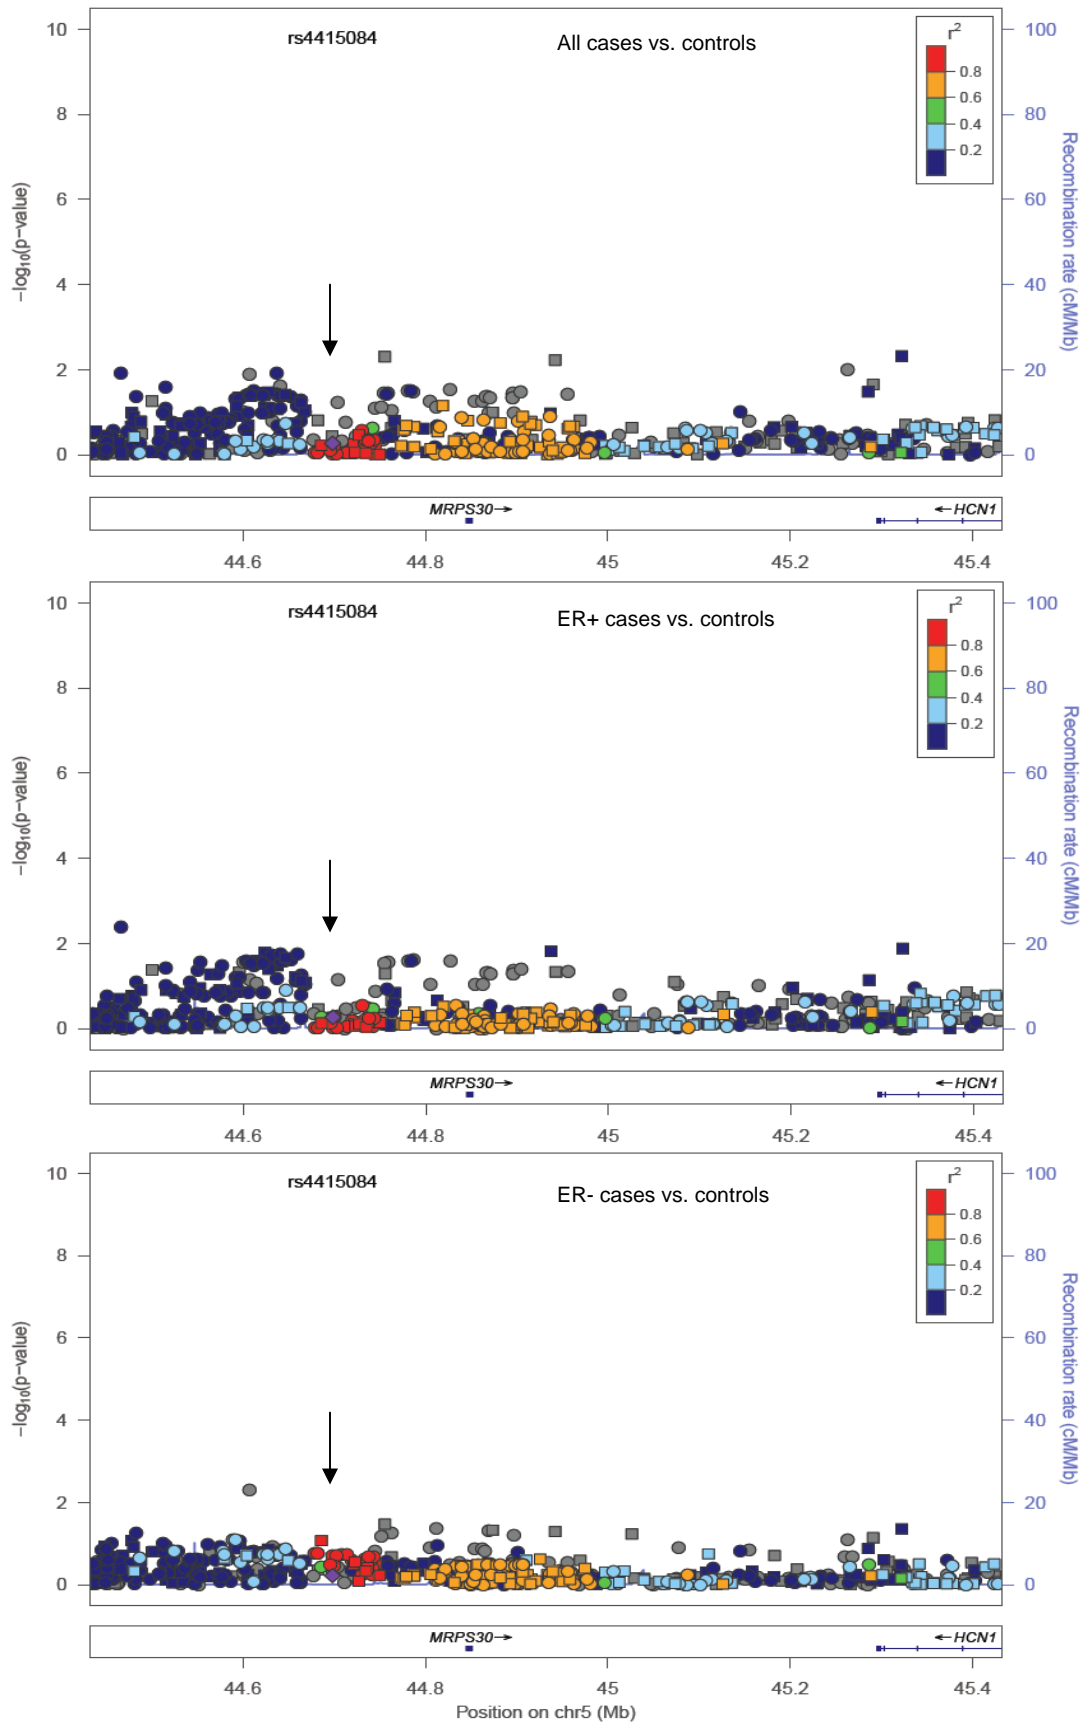

E 5q11

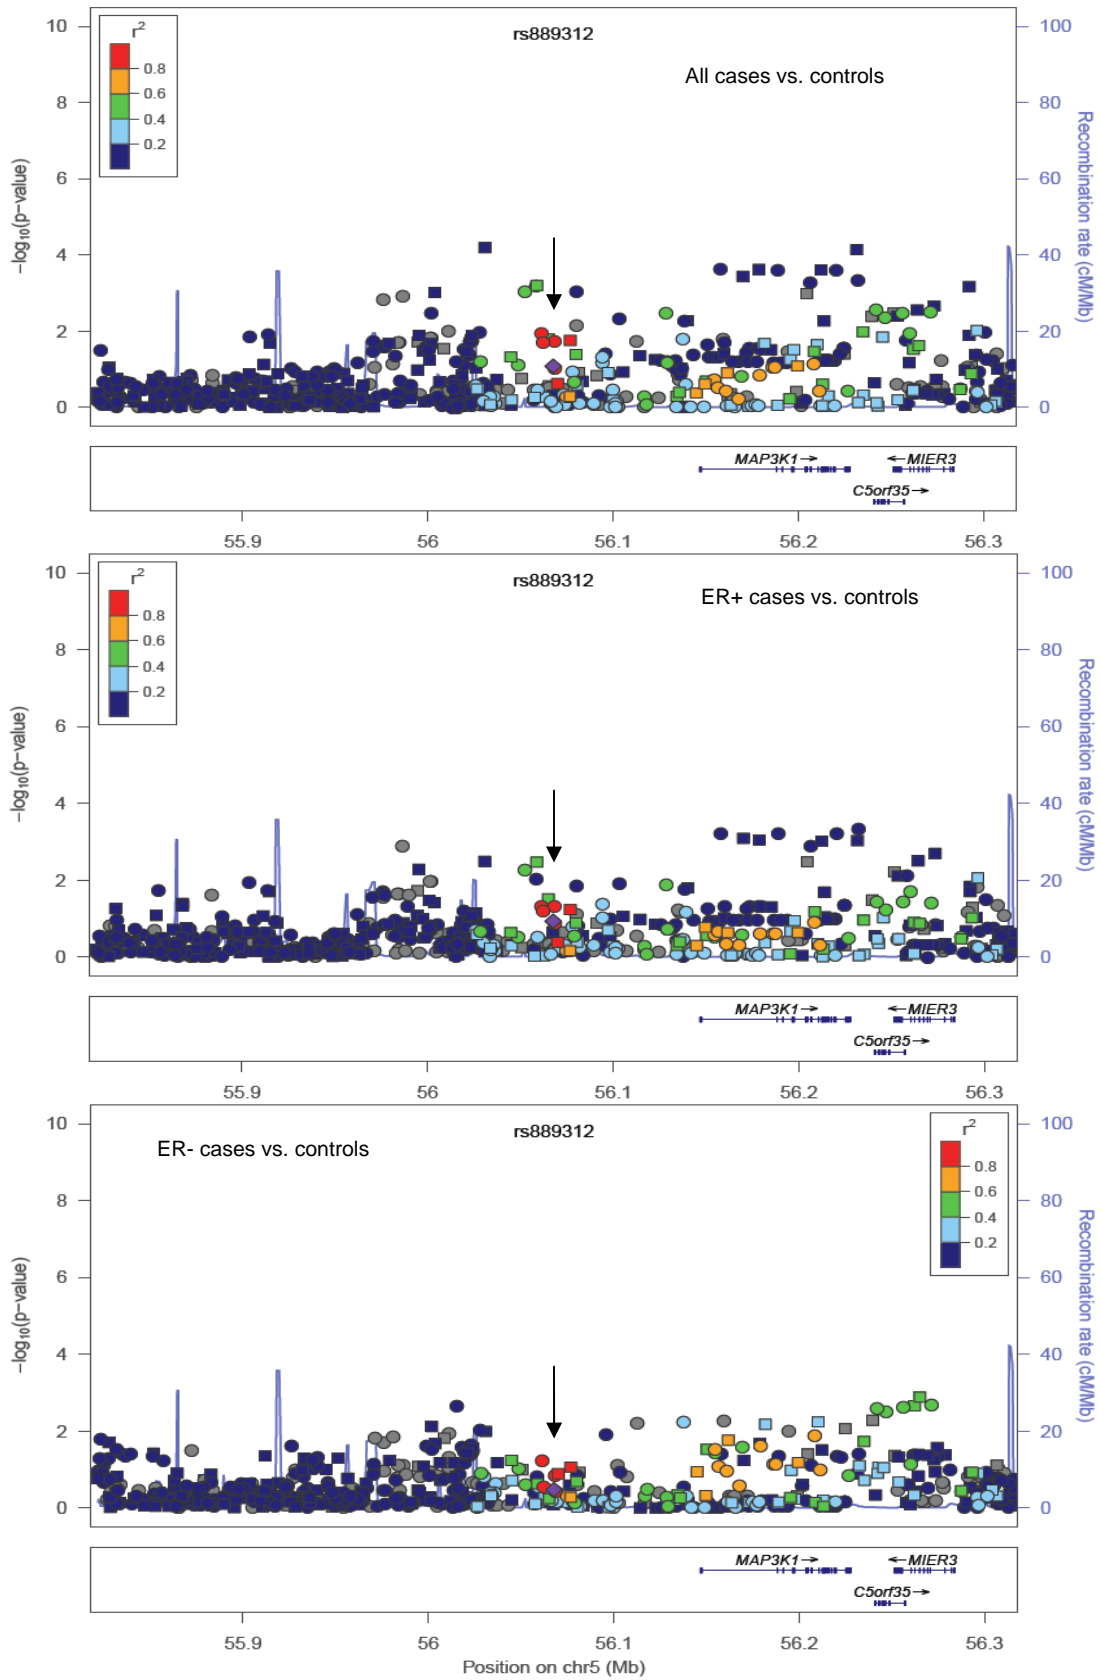

F 6q25

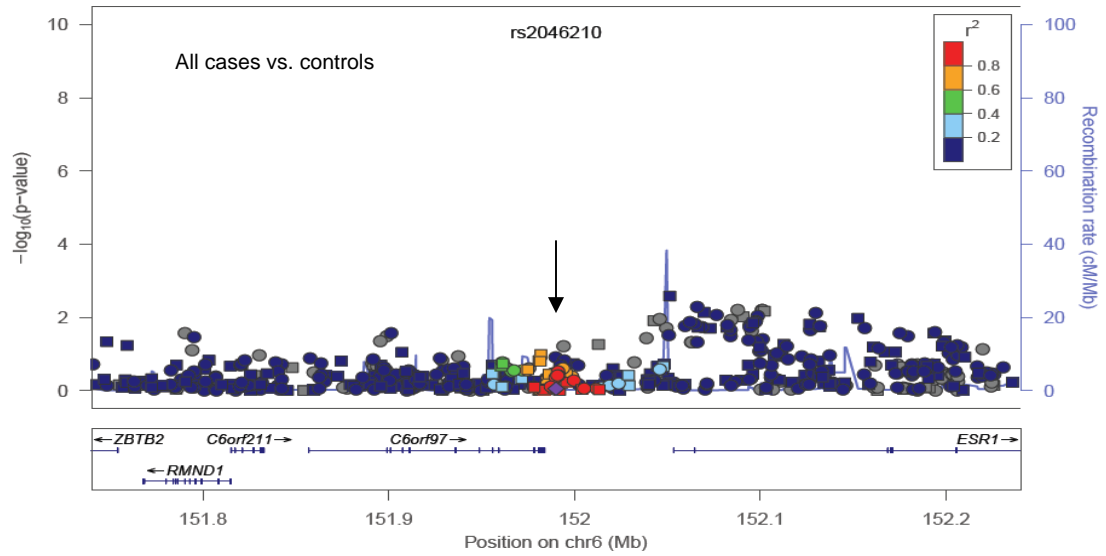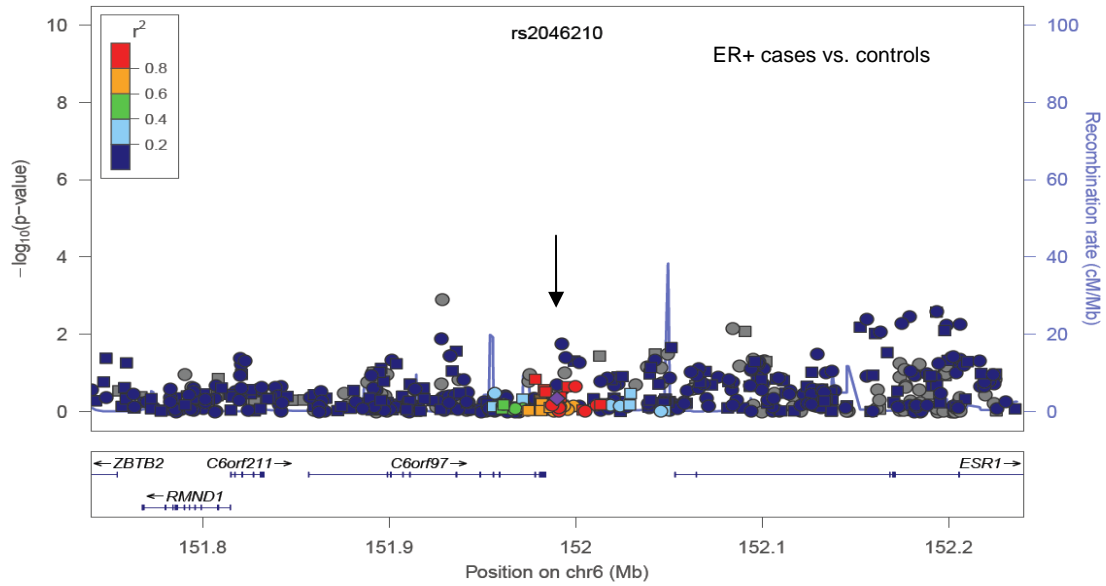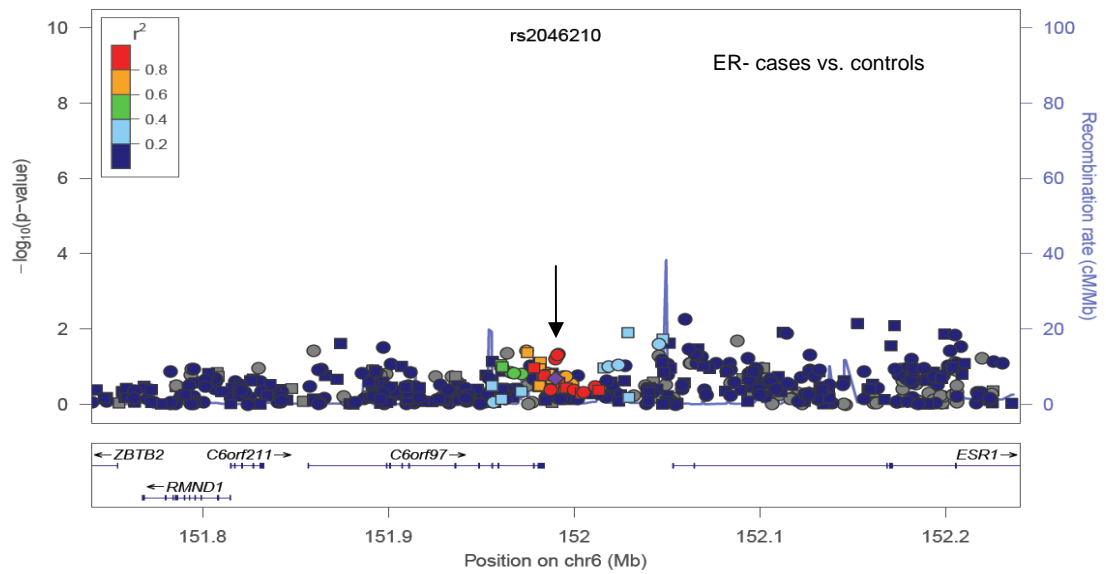

G 8q24

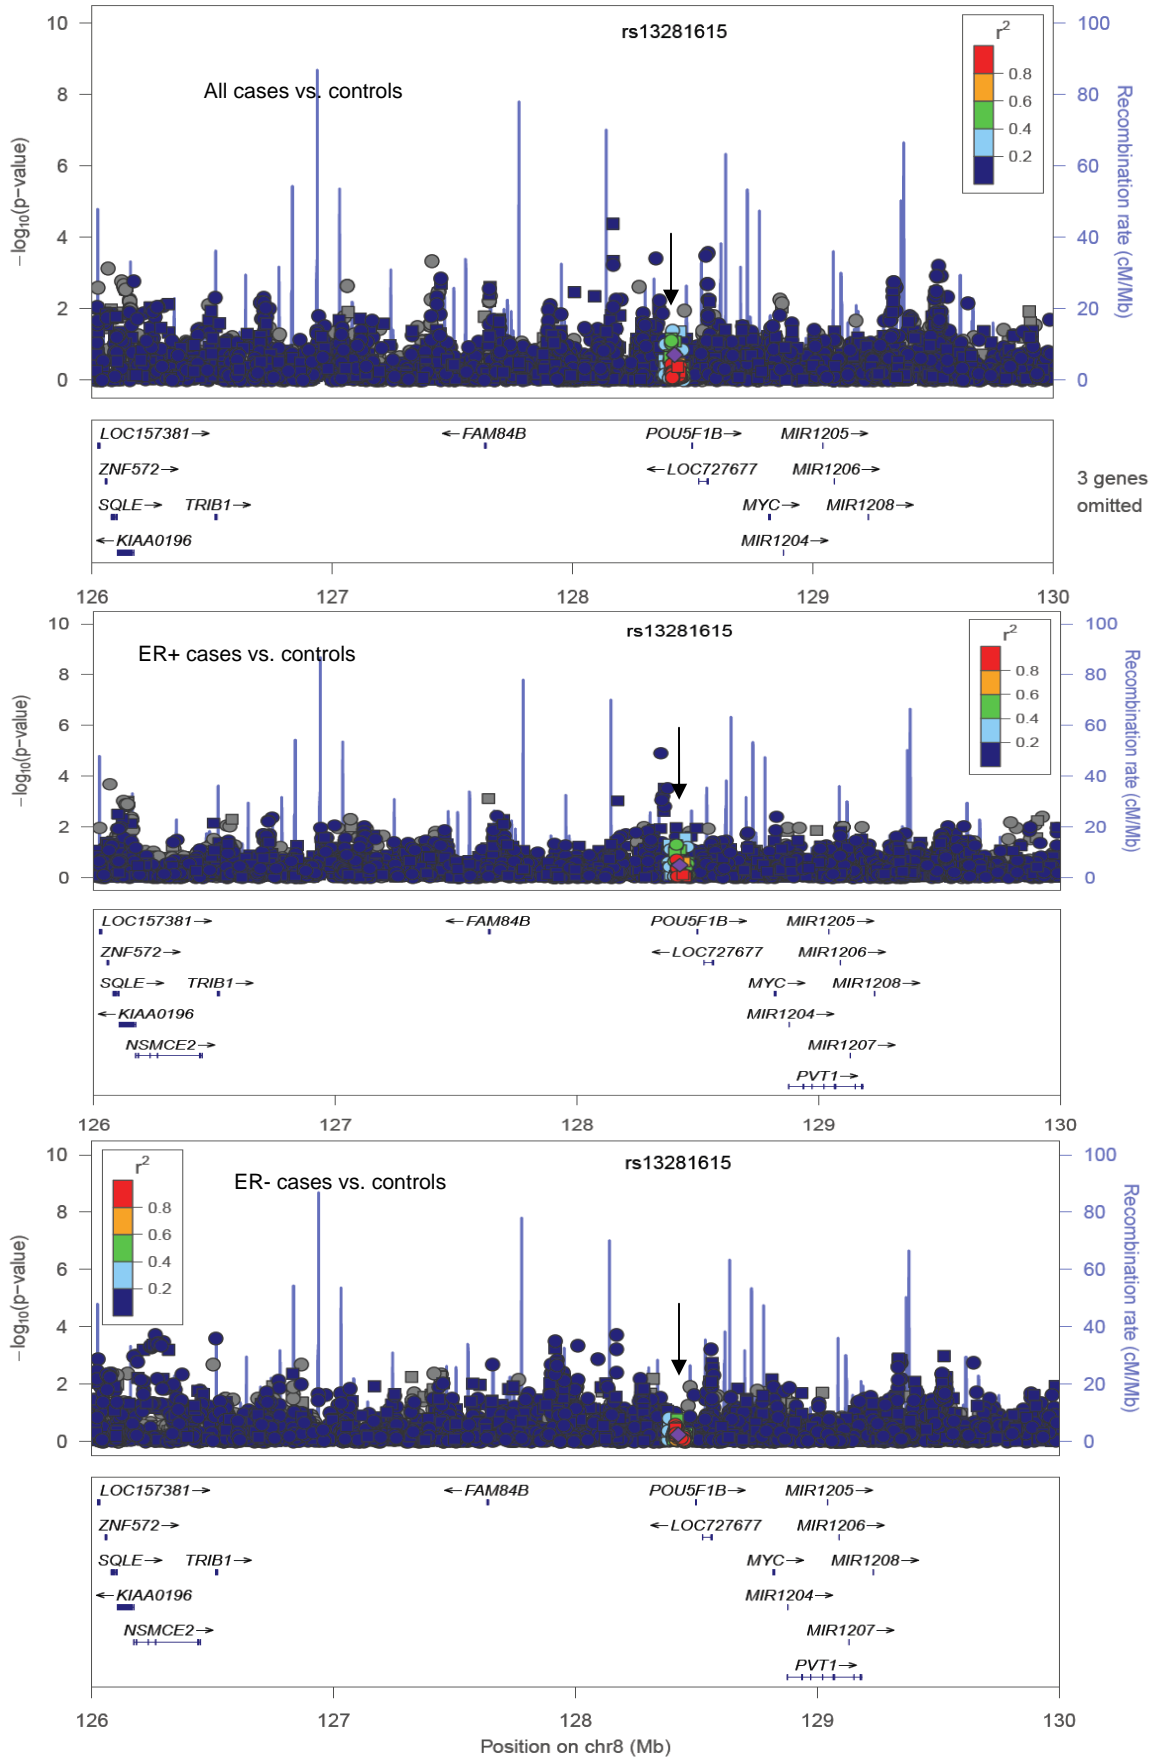

H 9p21

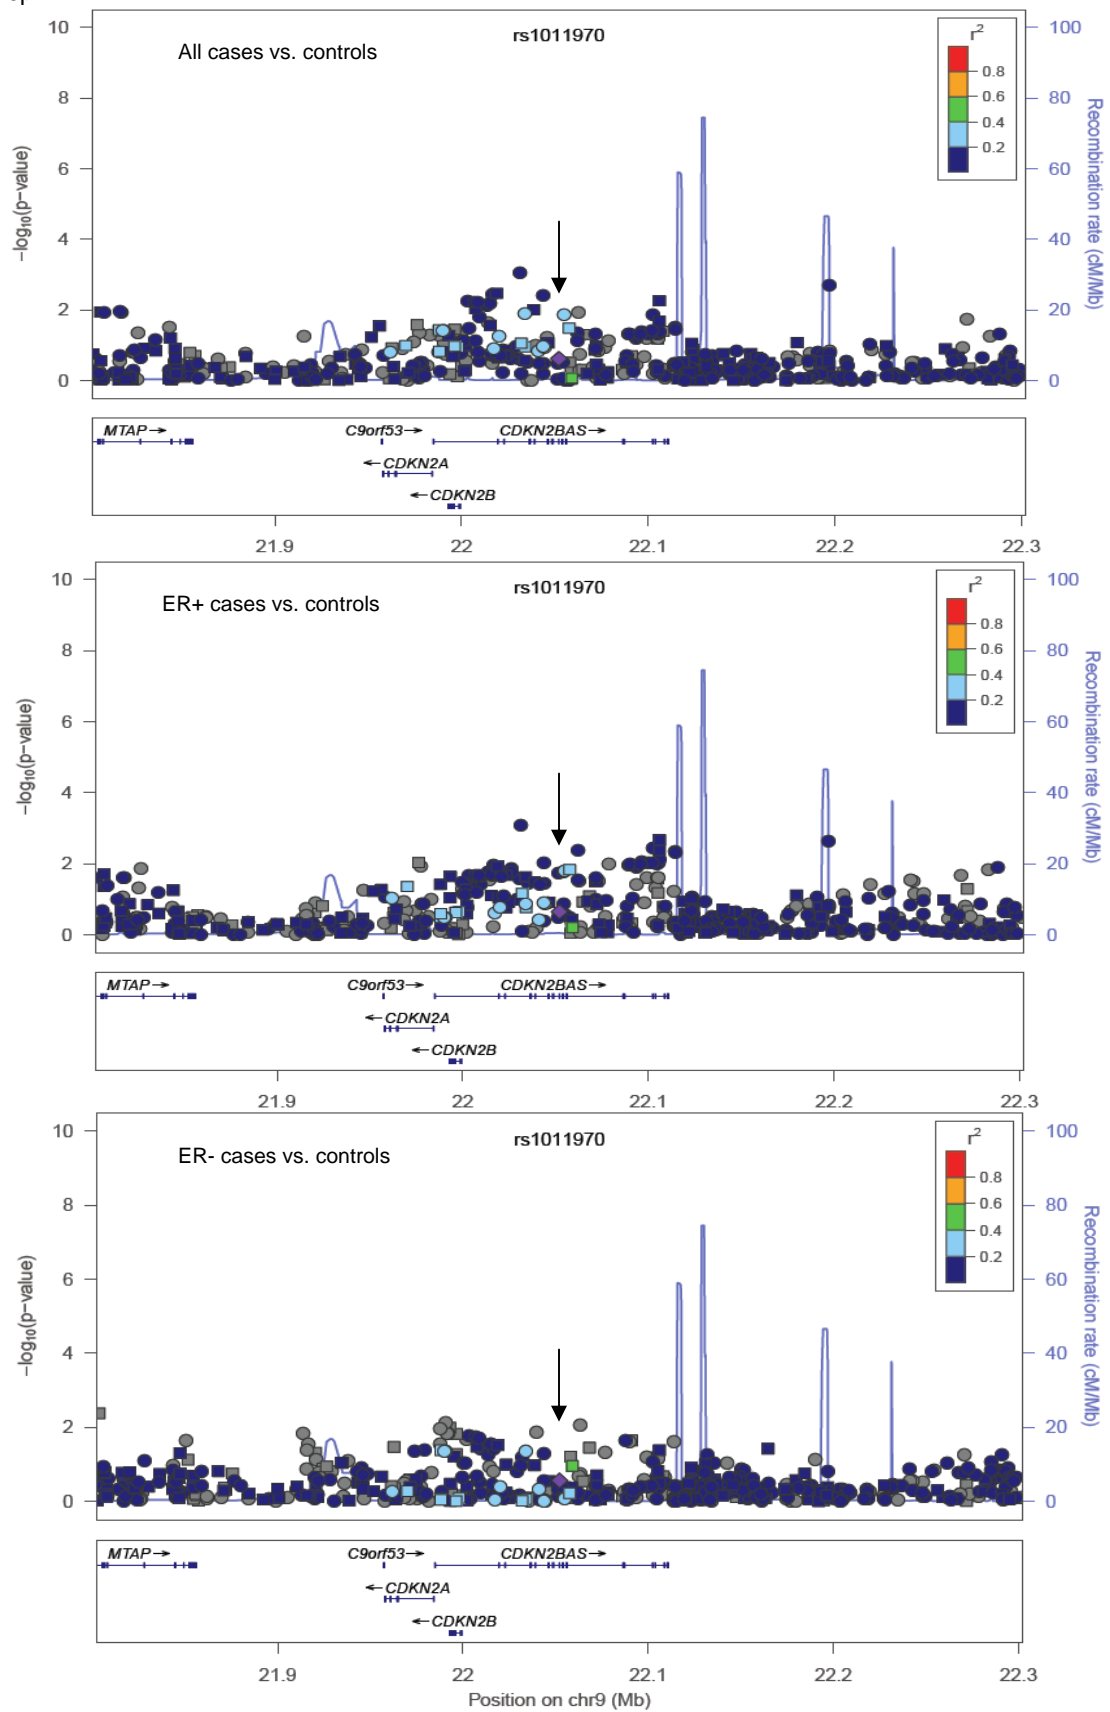



19q31

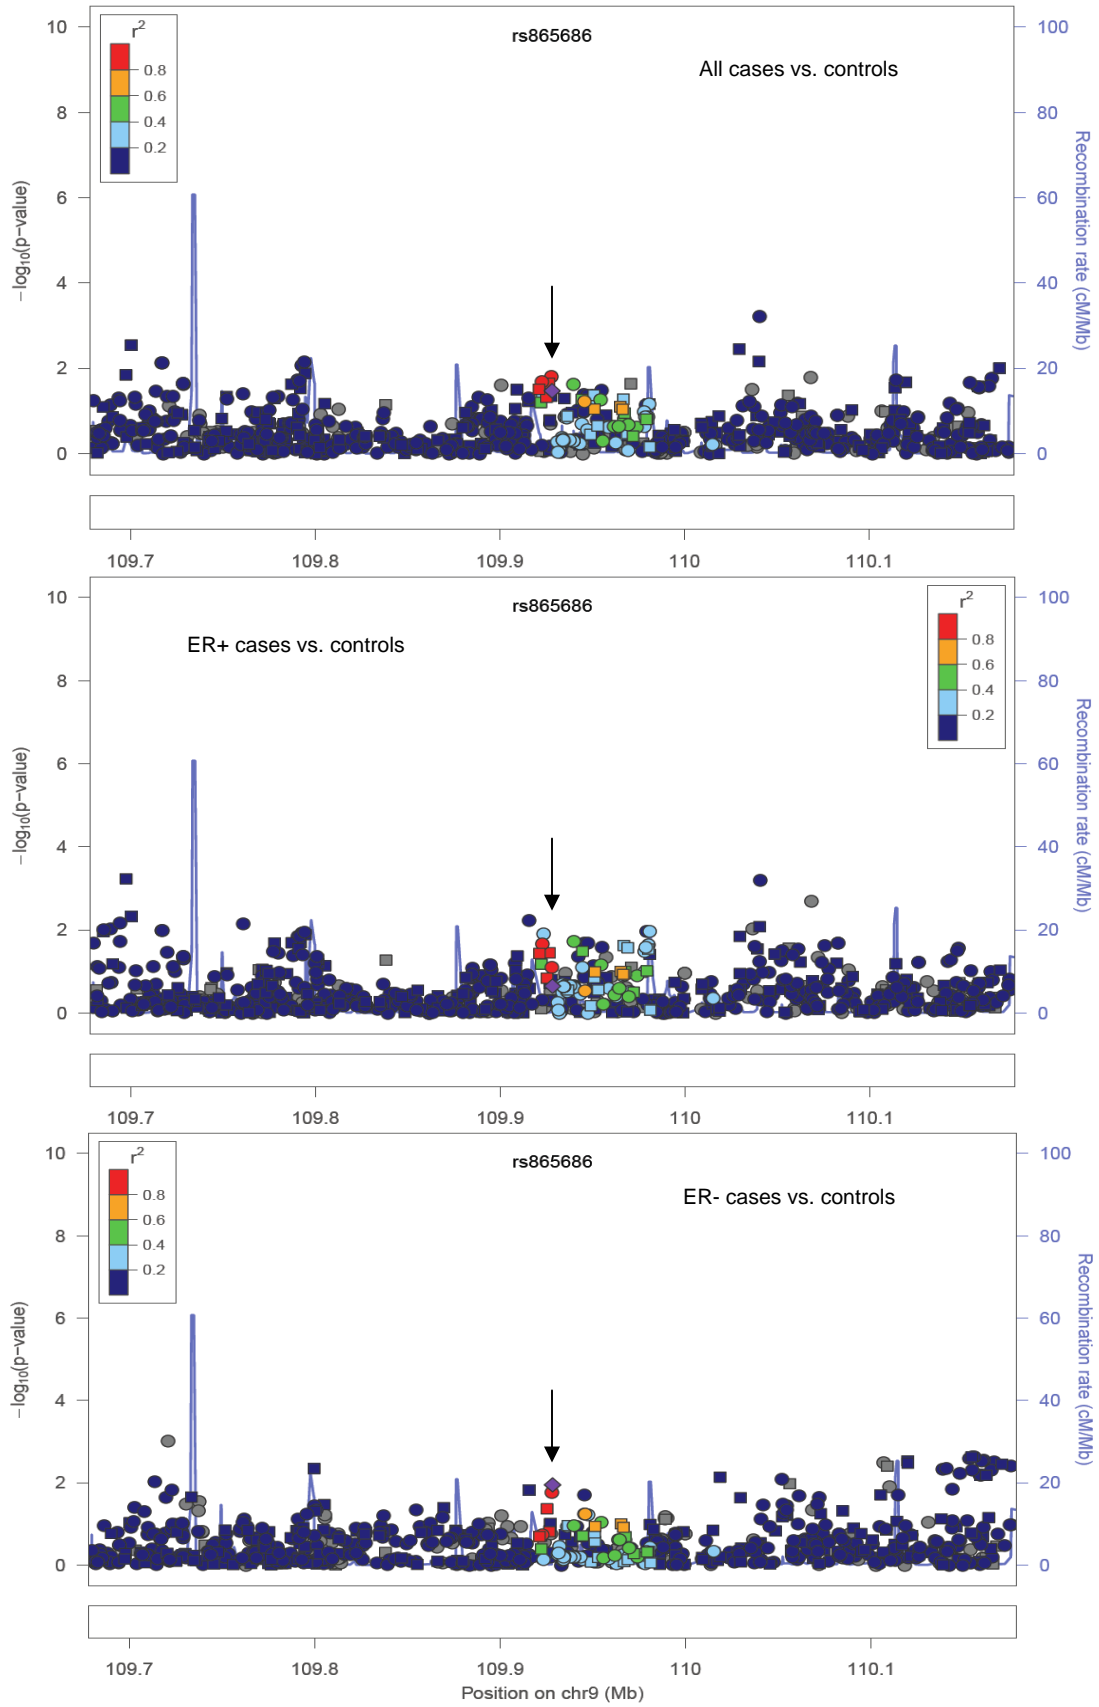

J 10p15

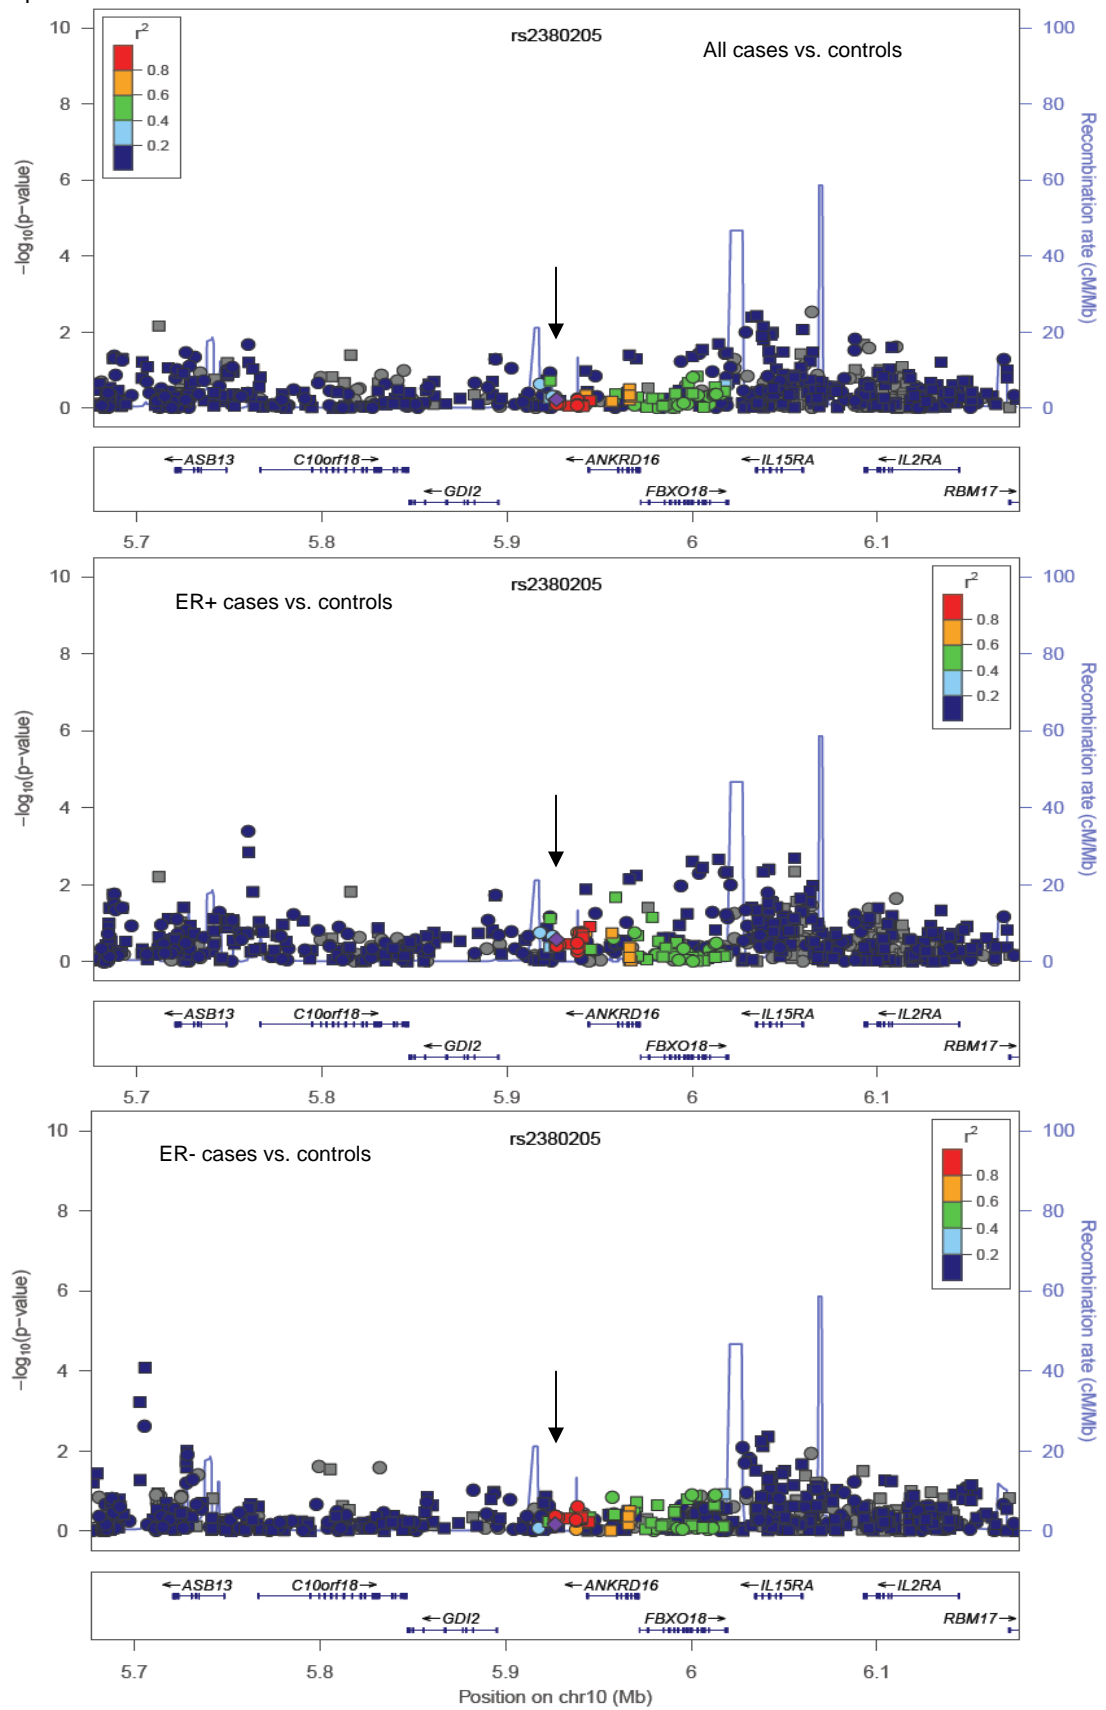

K 10q21

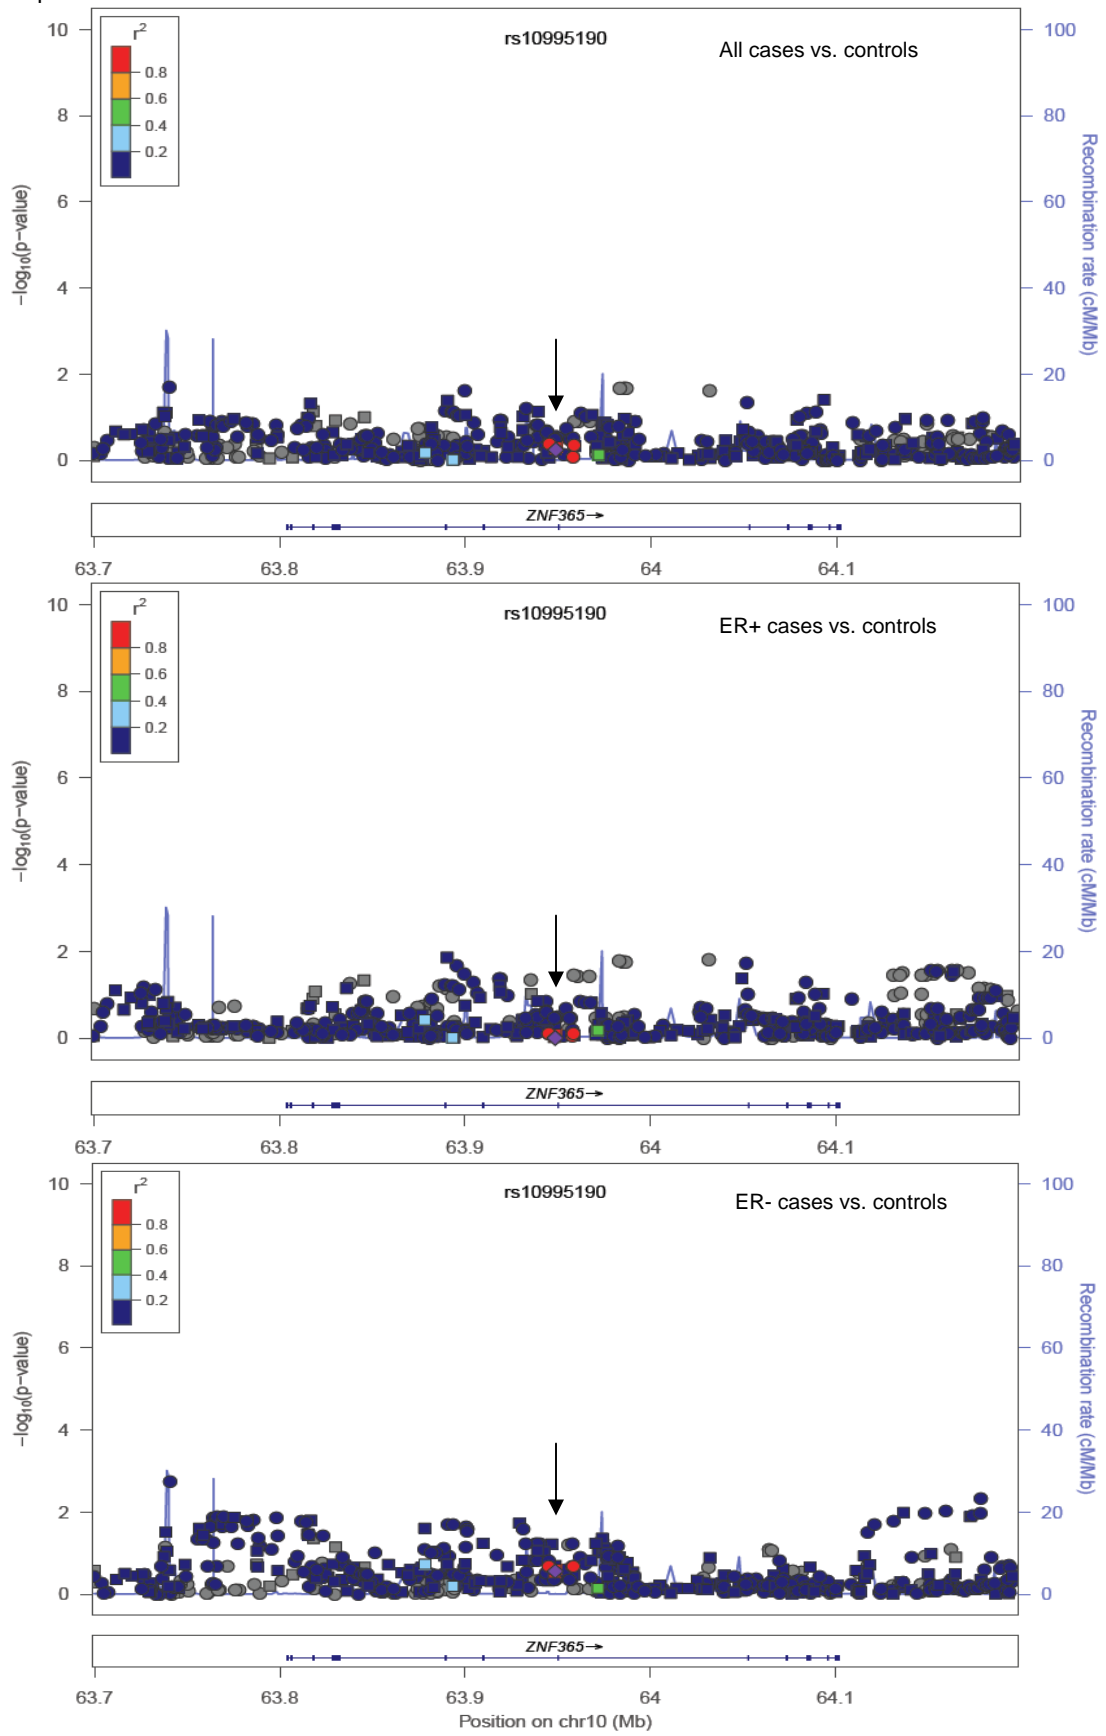

L 10q22

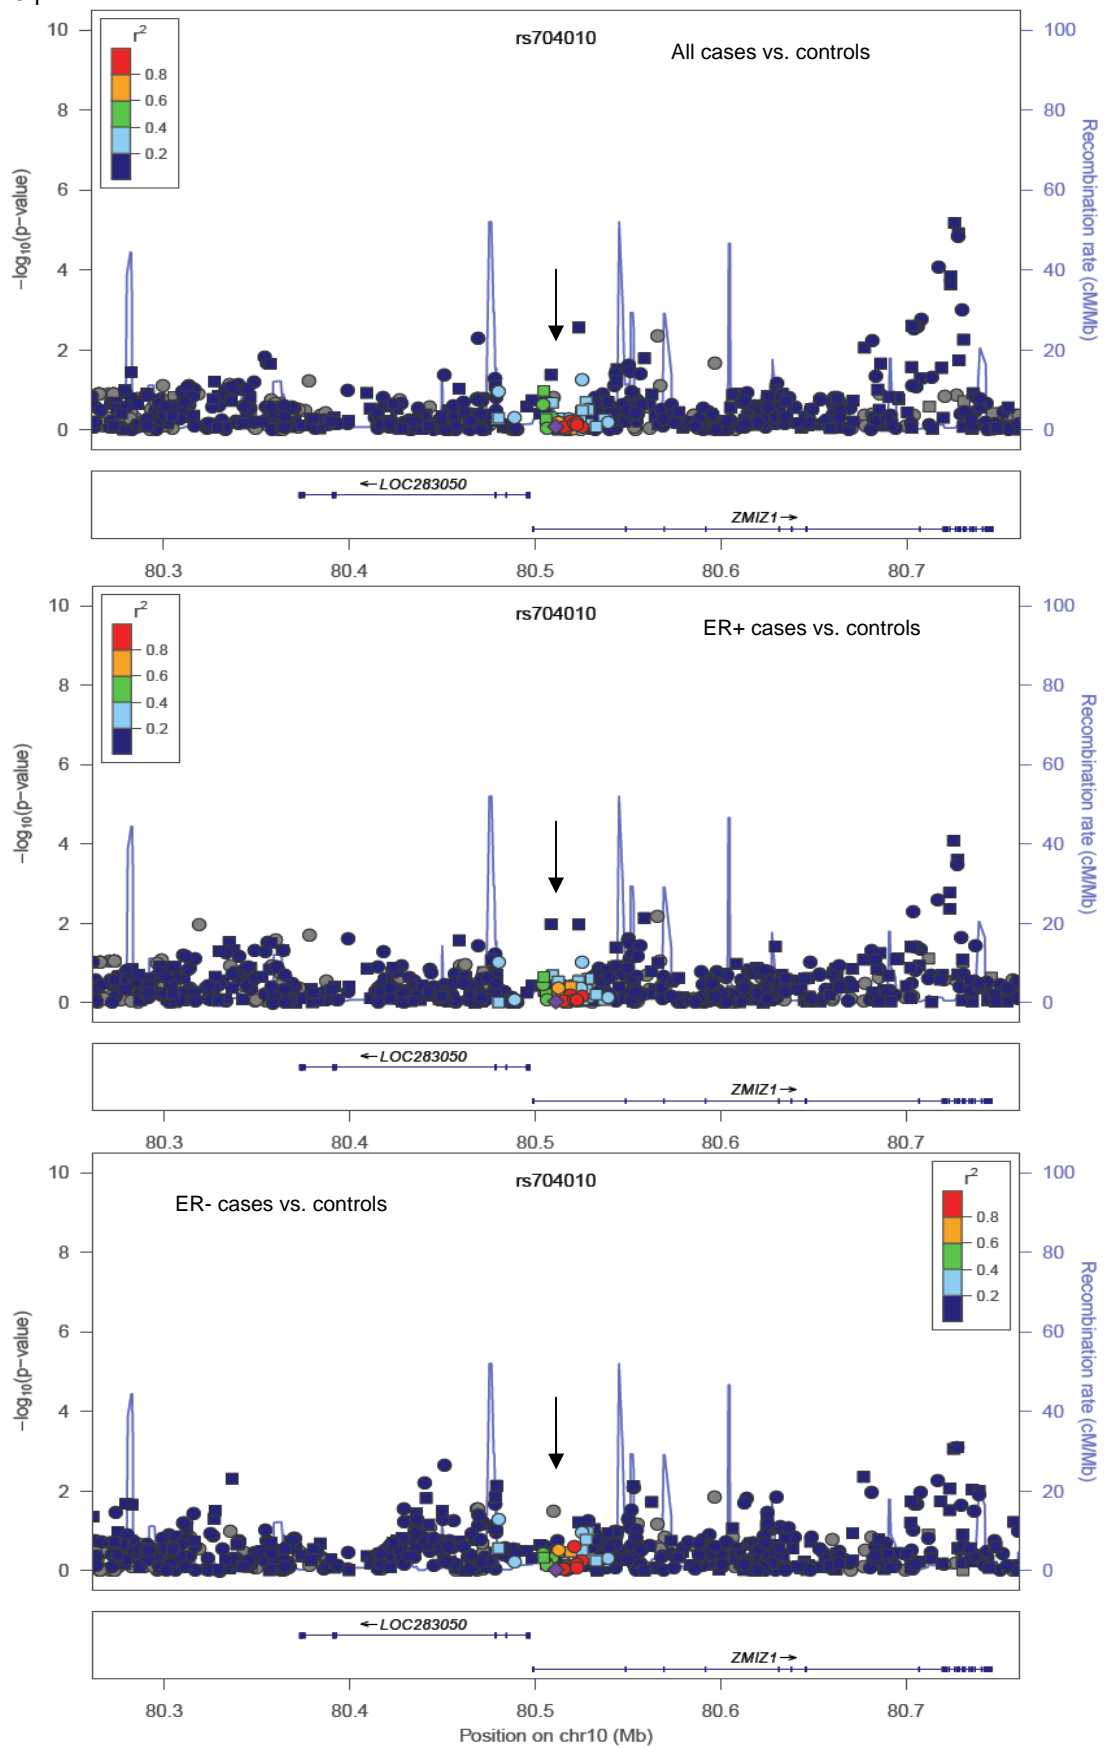

M 10q26

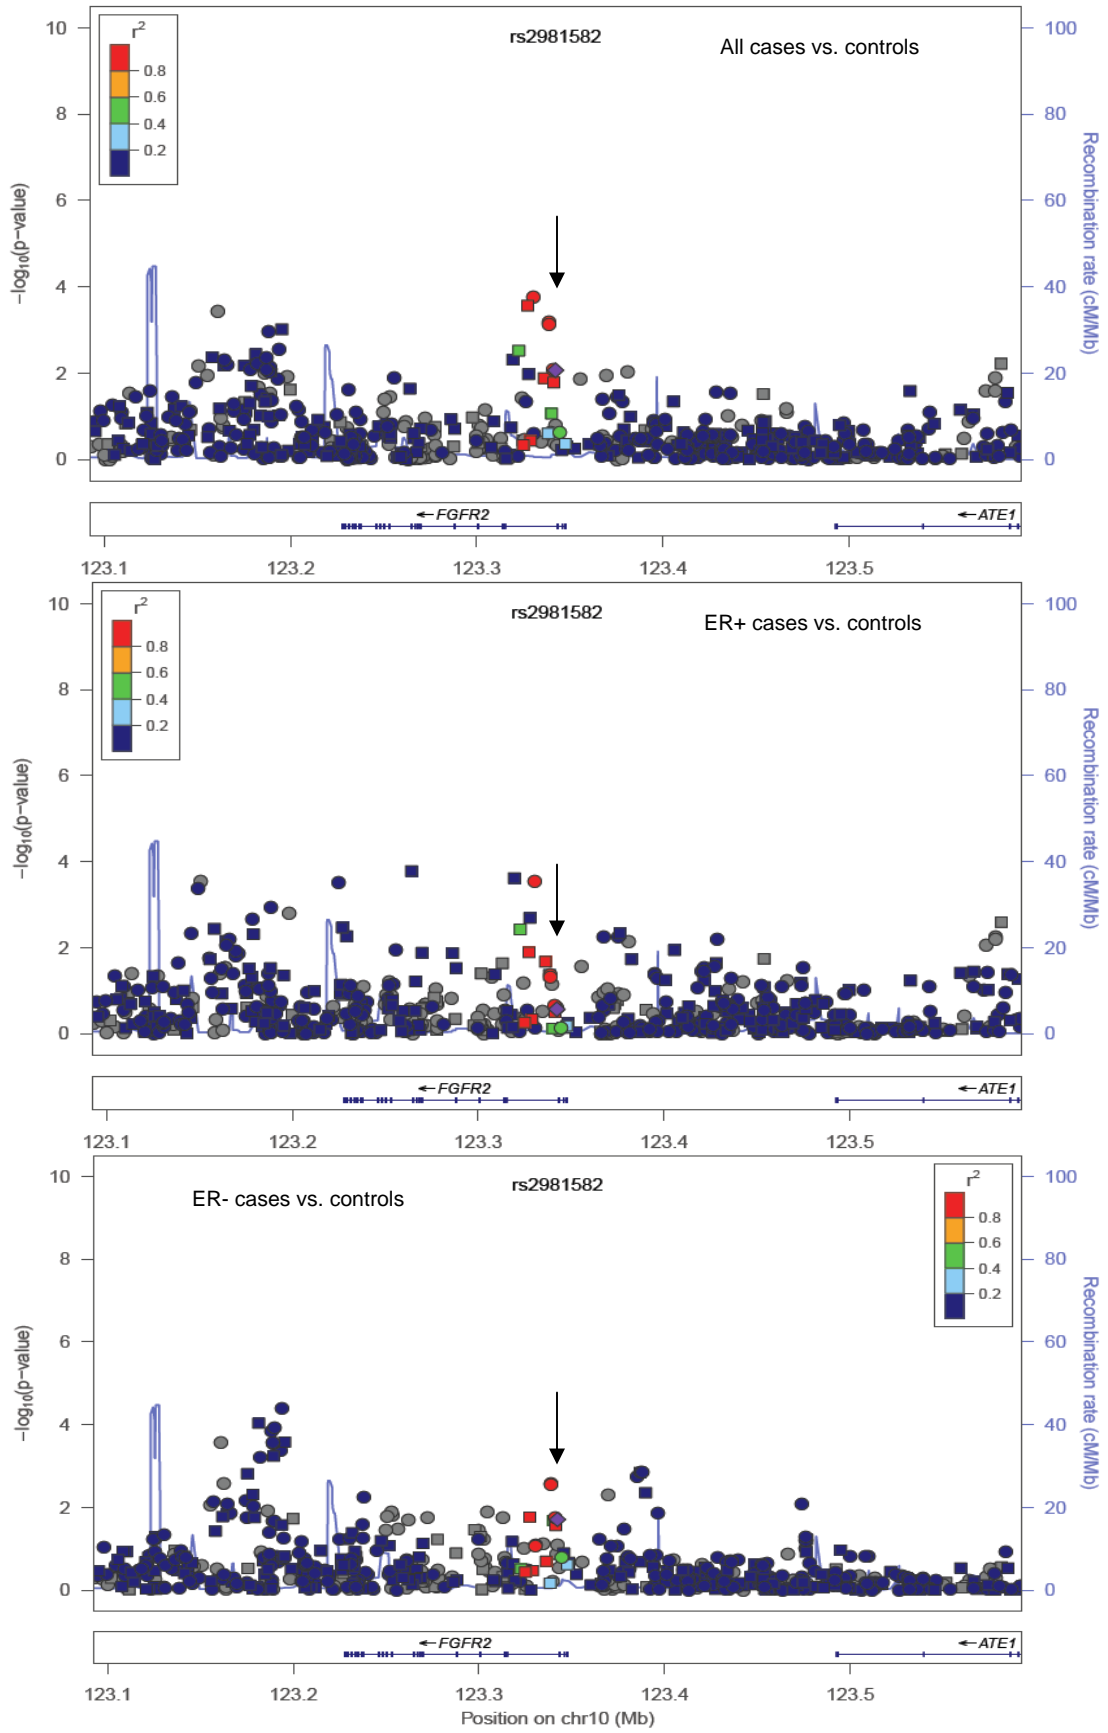

N 11p15

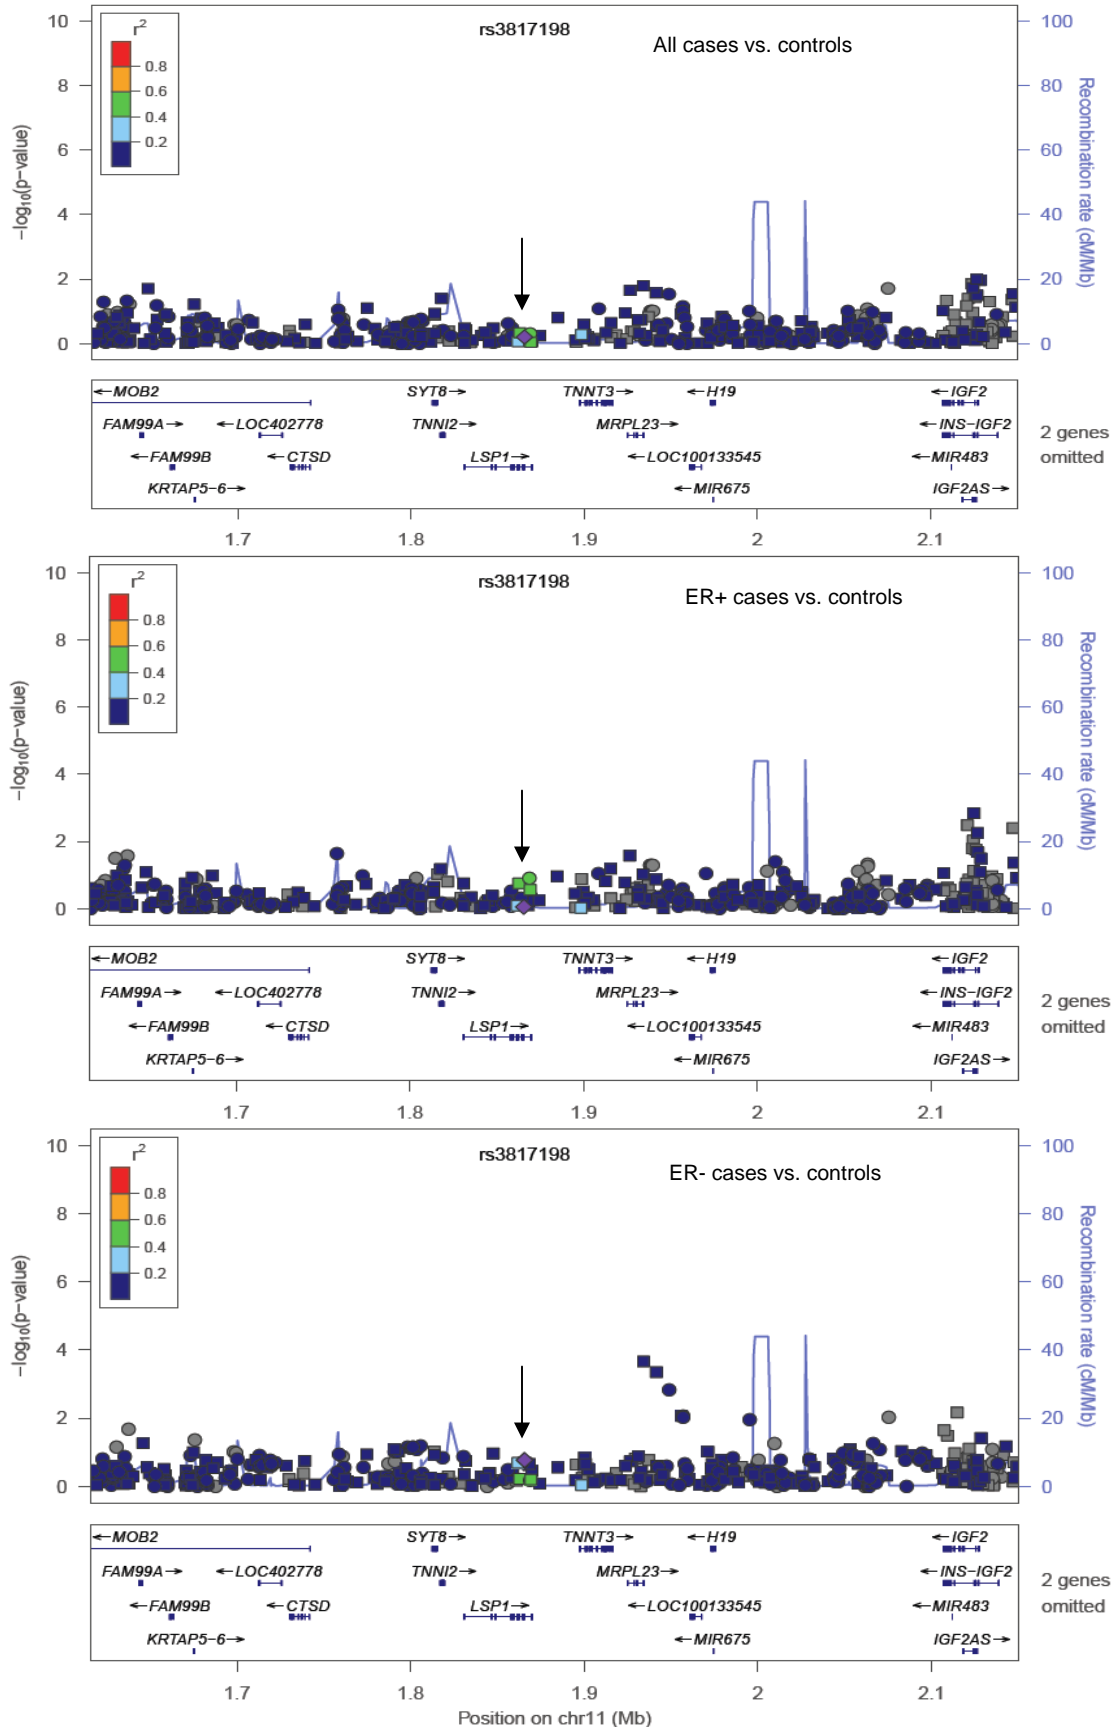

O 11q13

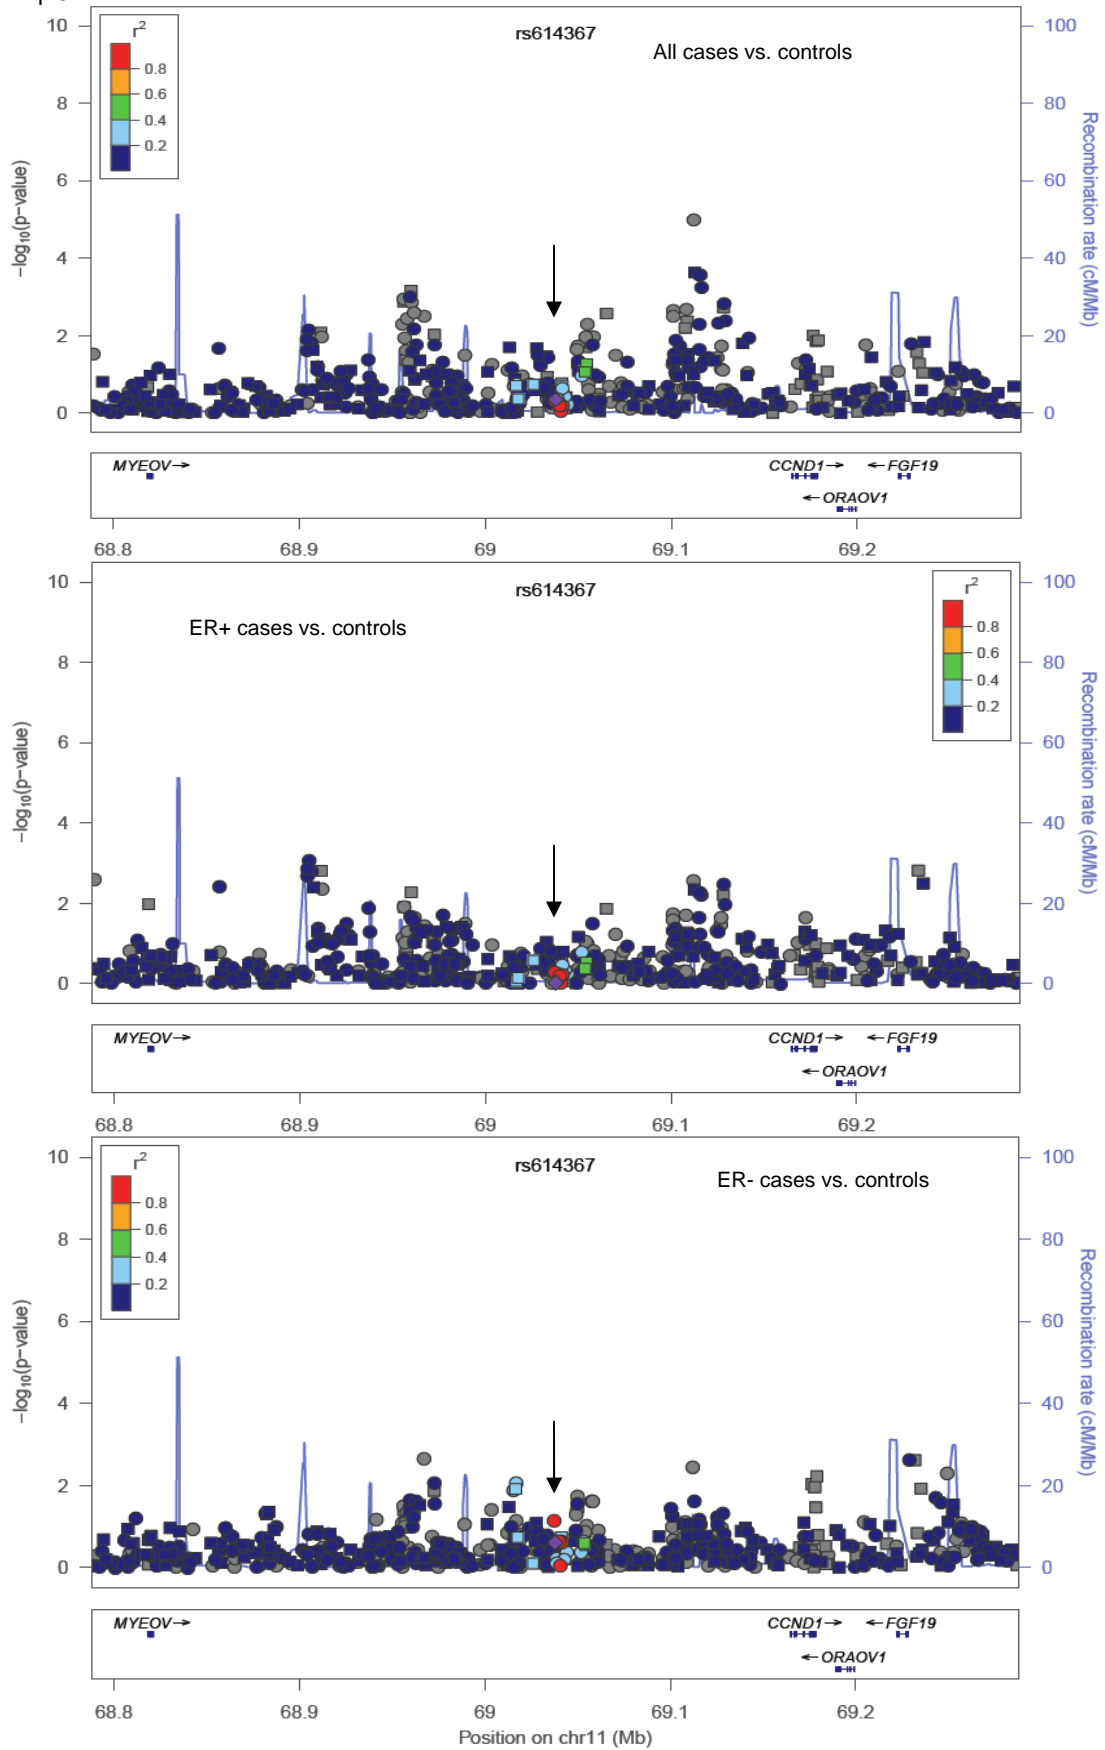

P 14q24

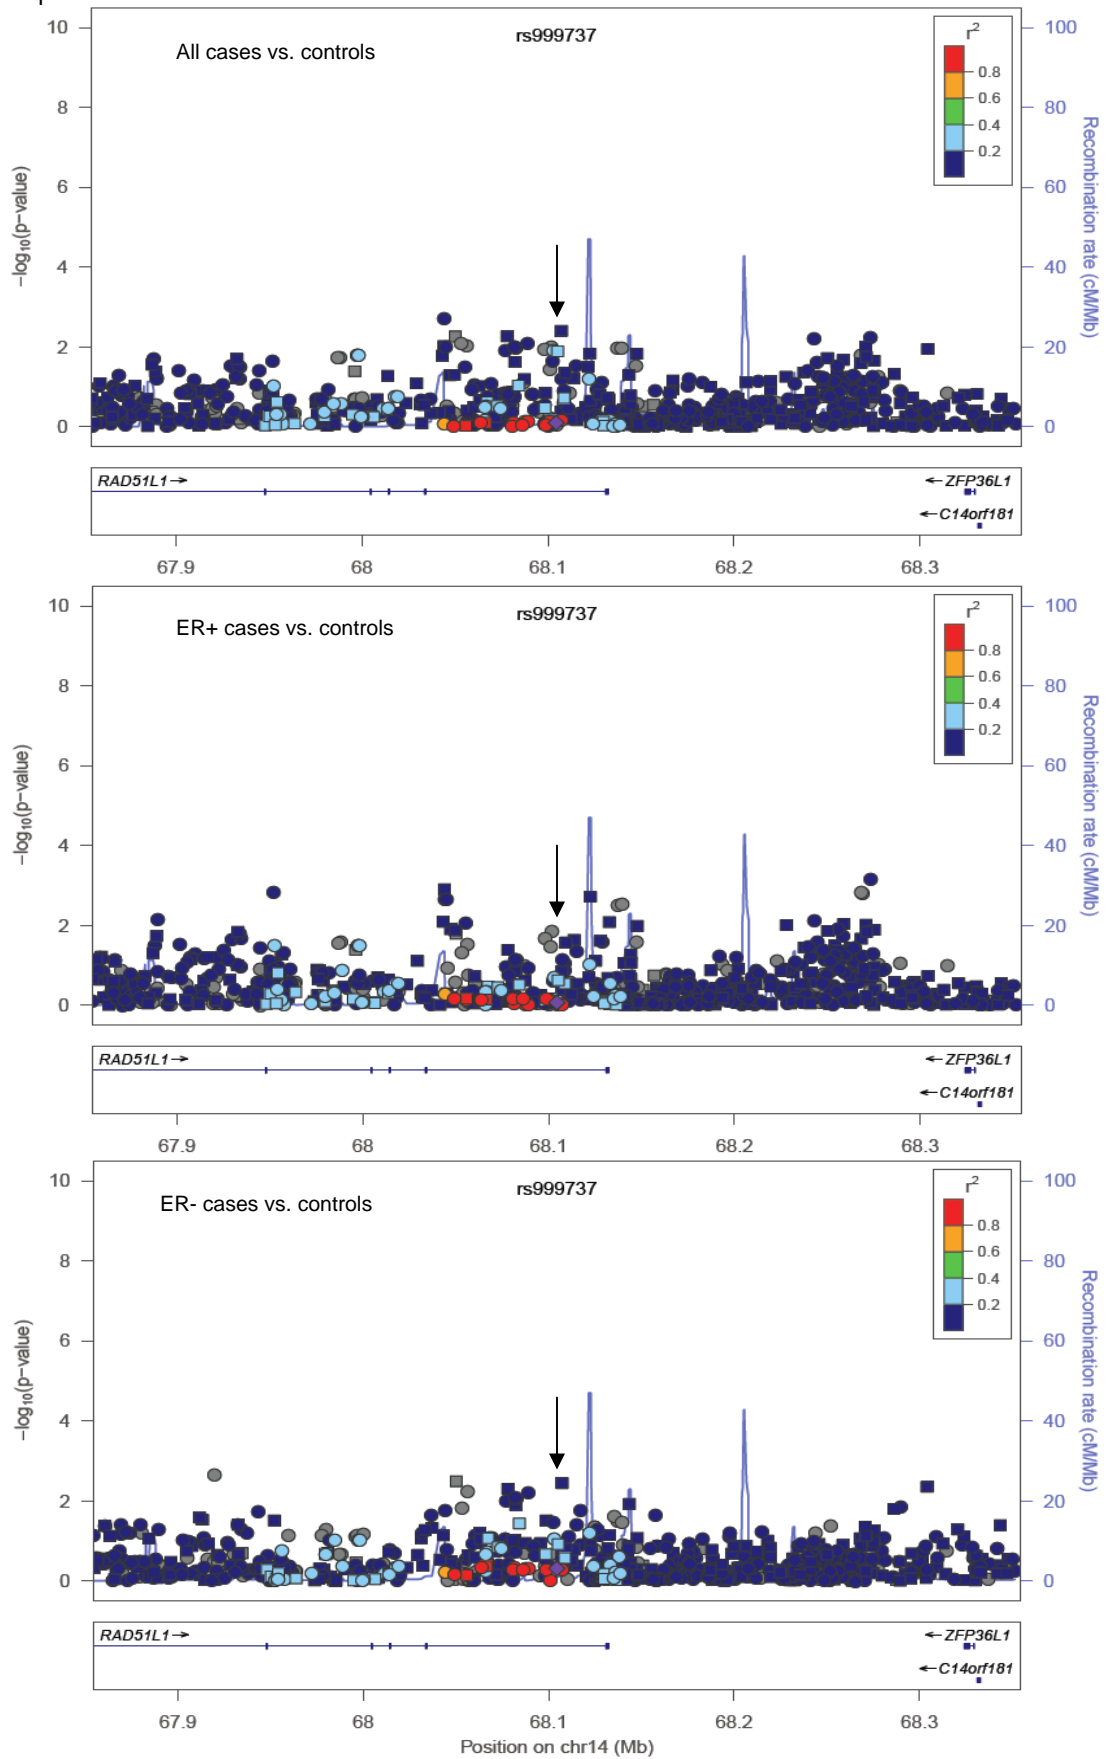



Q 16q12

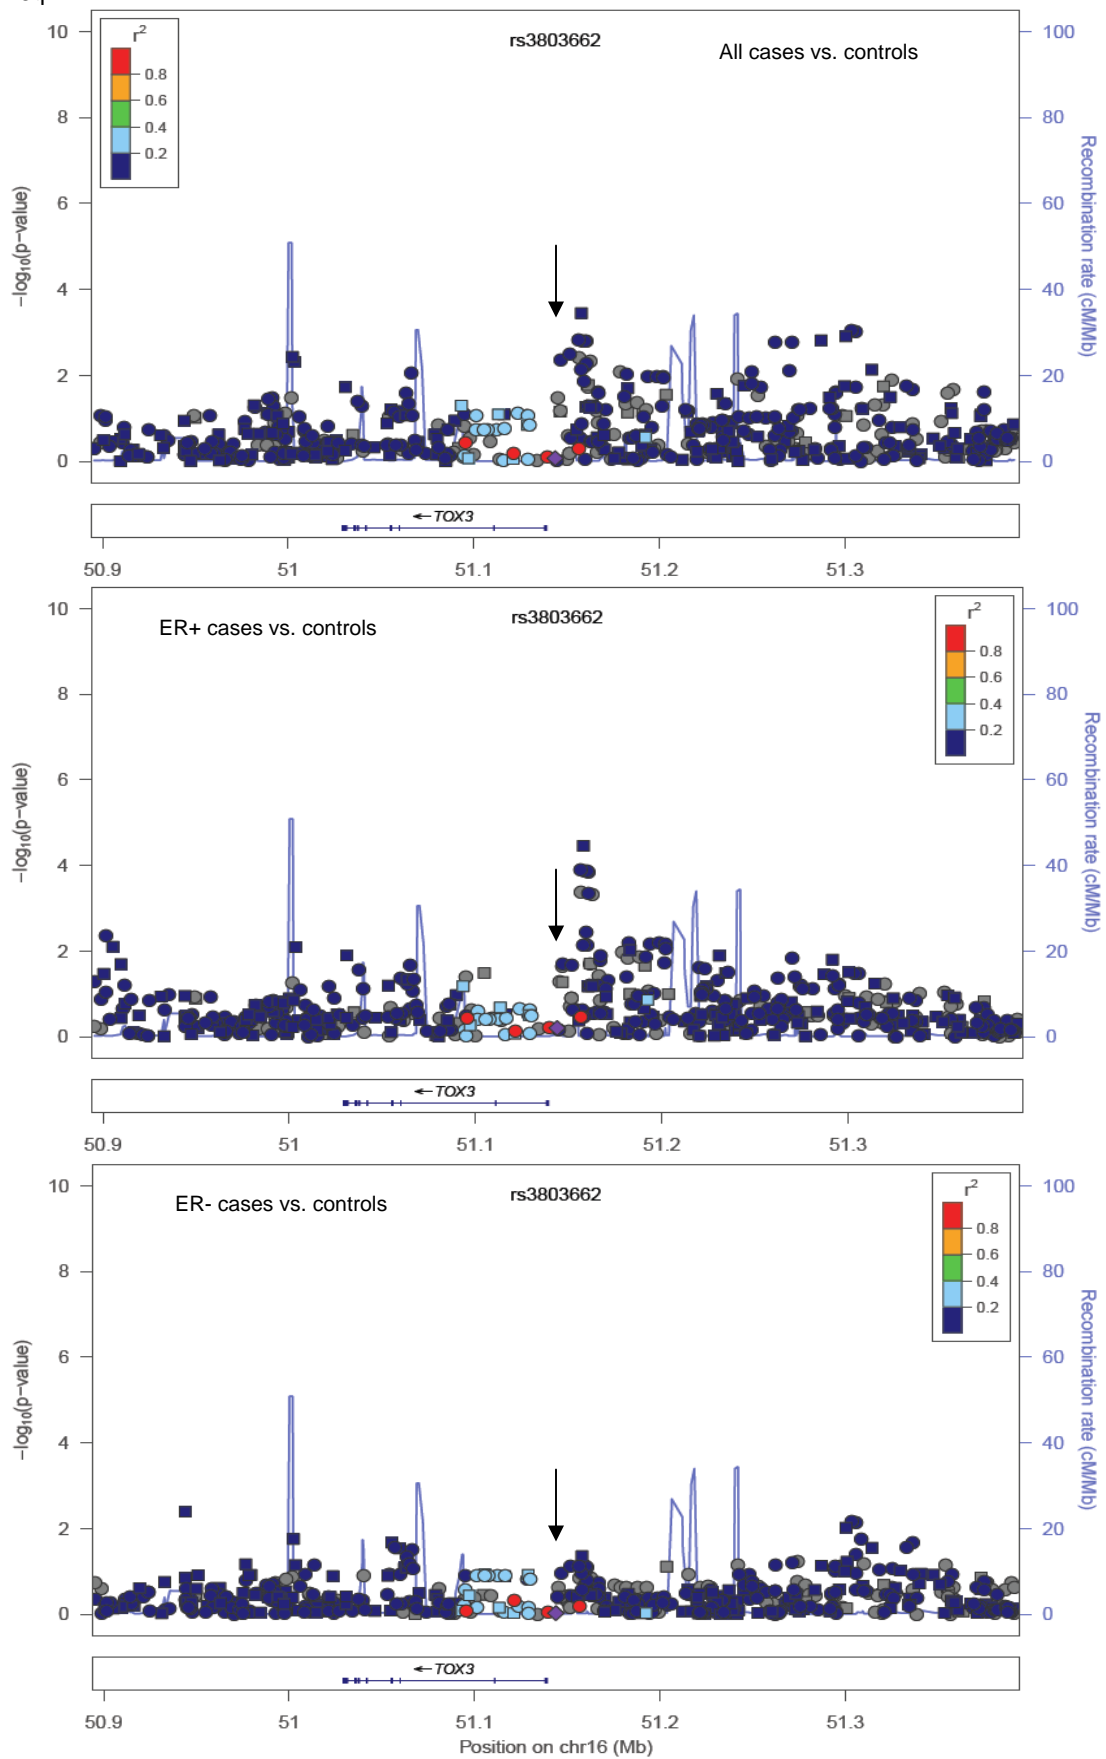

R 17q23

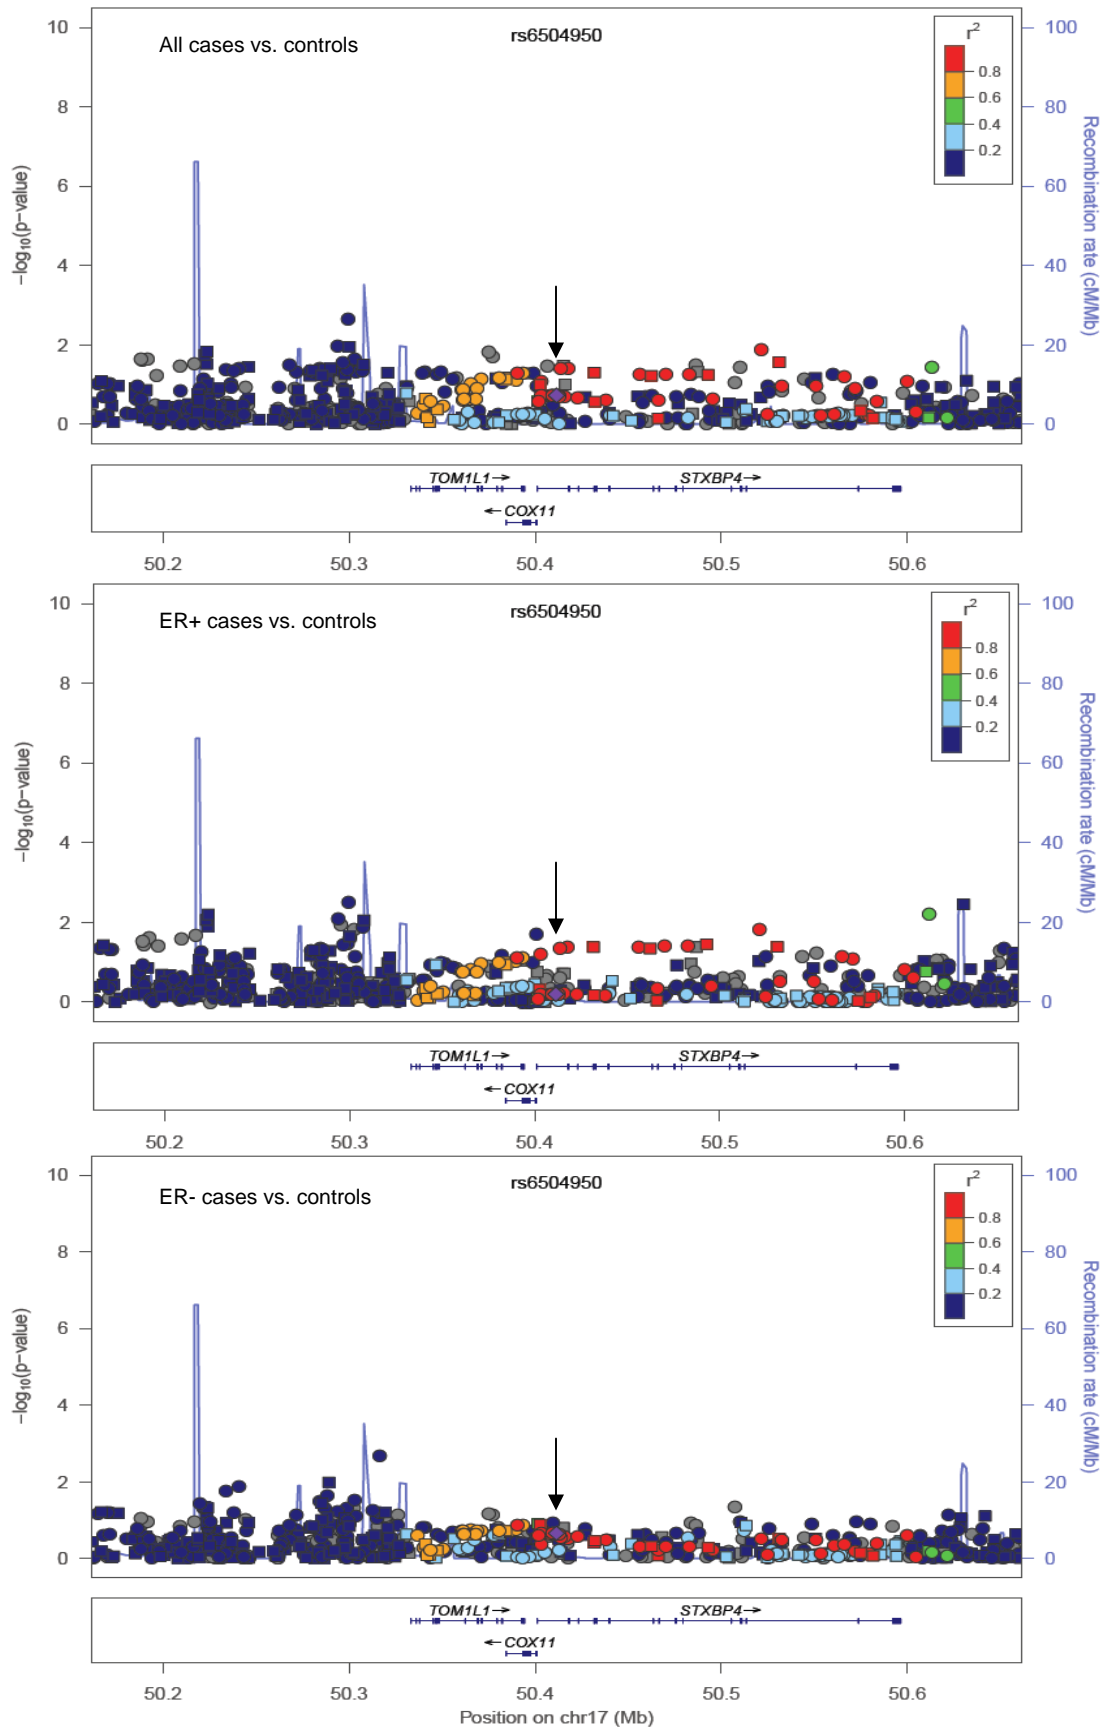

S 19p13

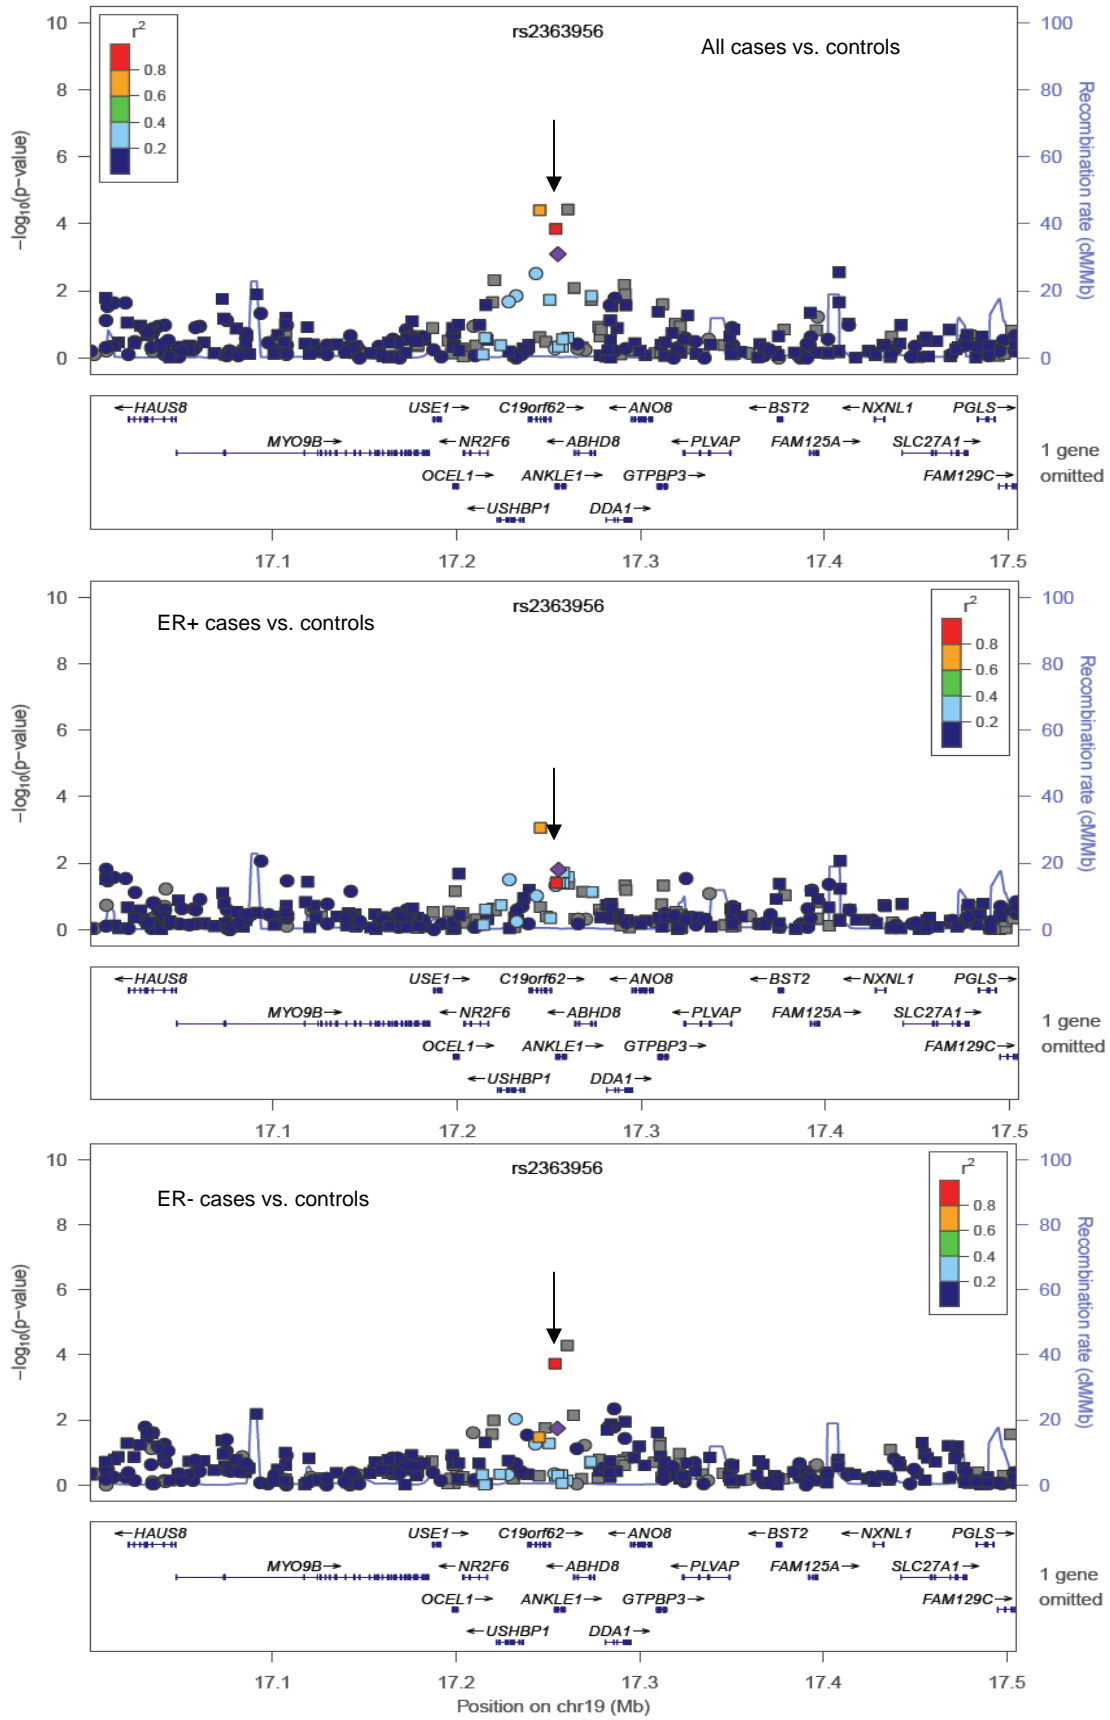

Figure S2  
A 2q35

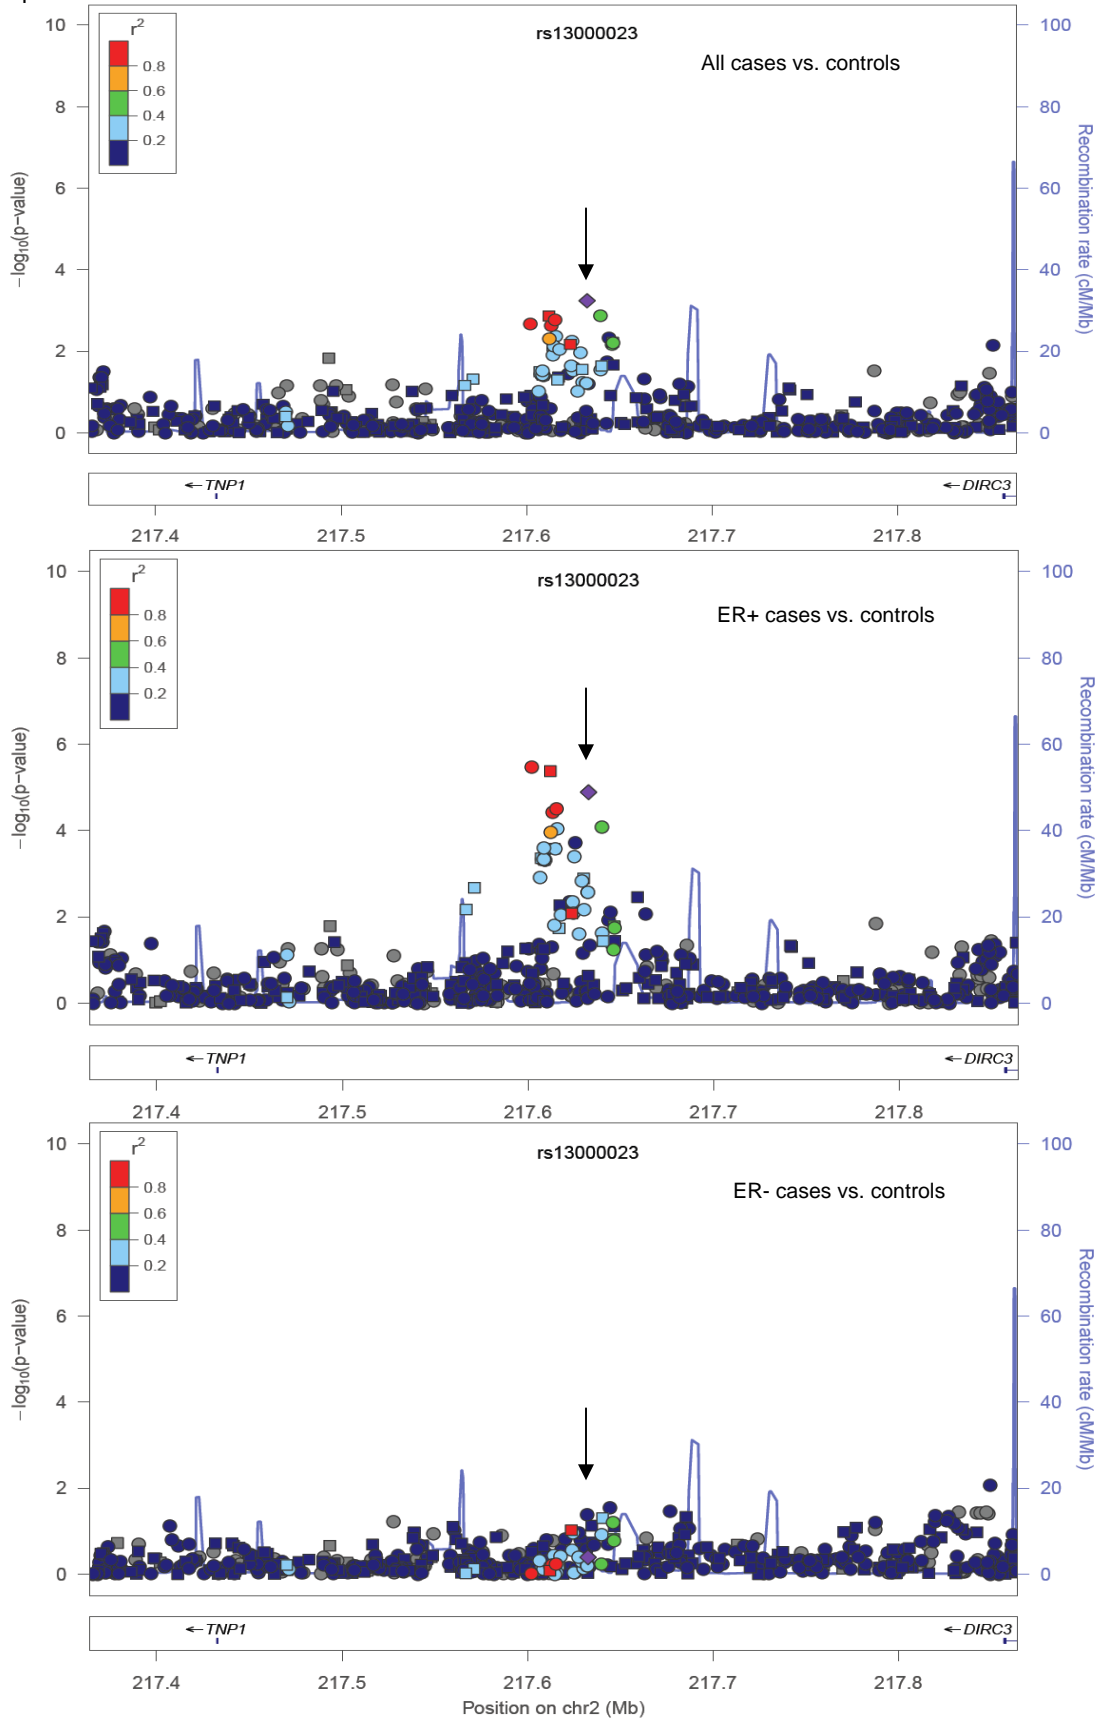

B 5q11

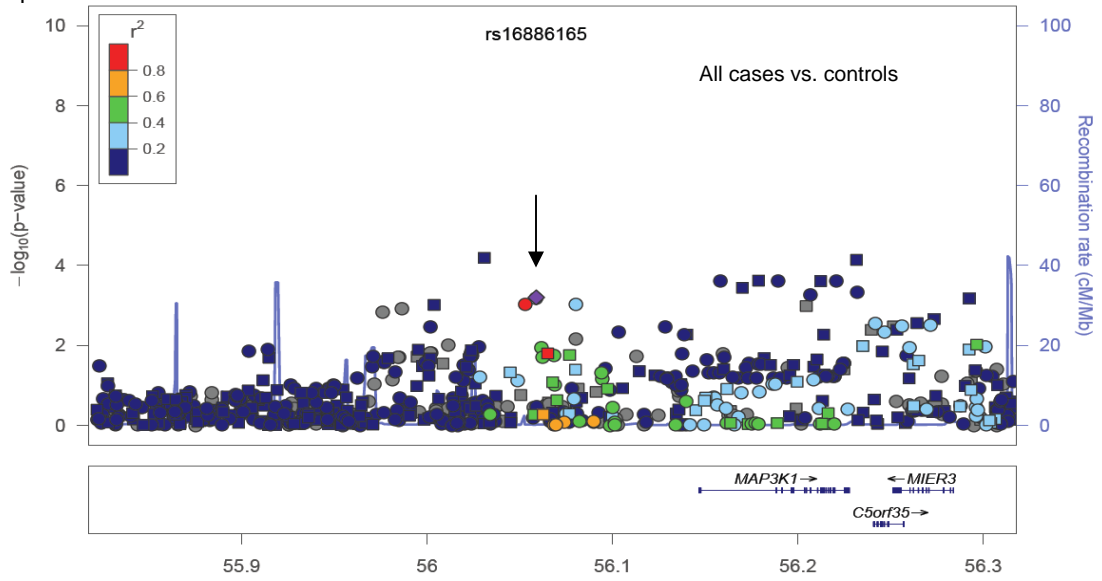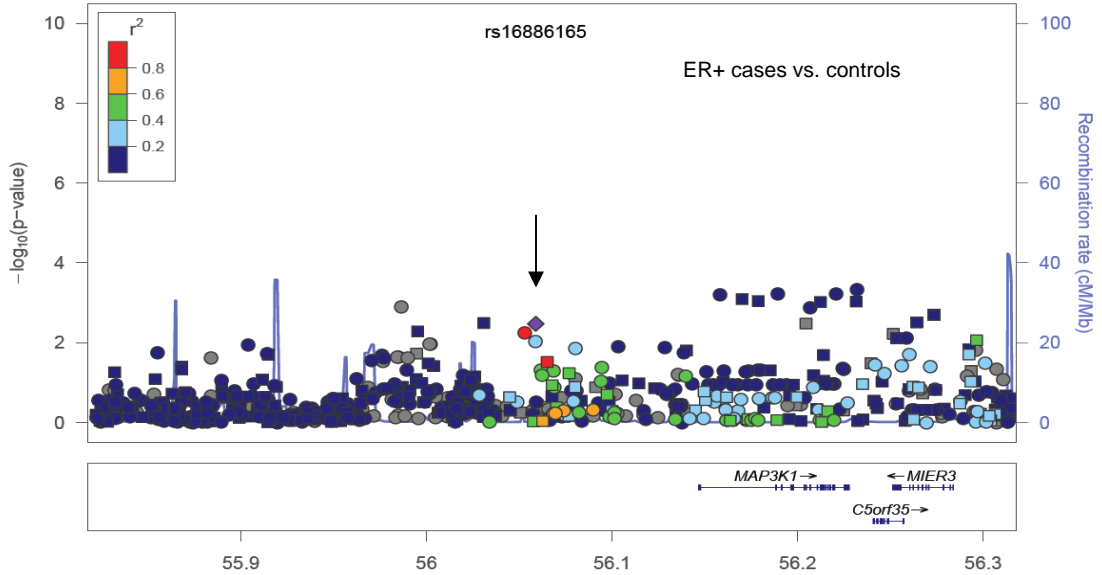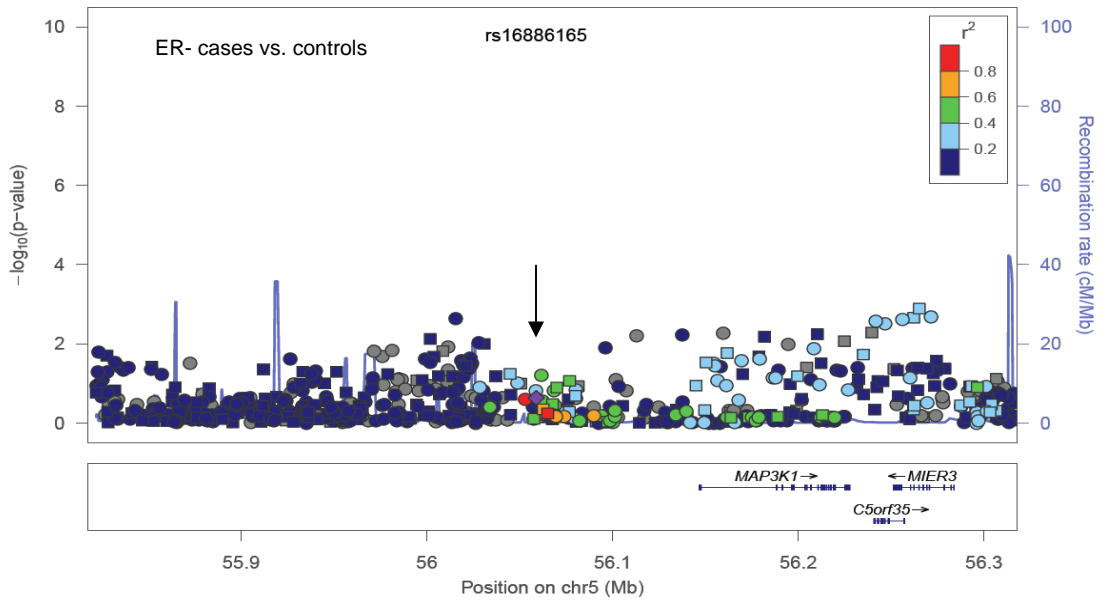

C 8q24

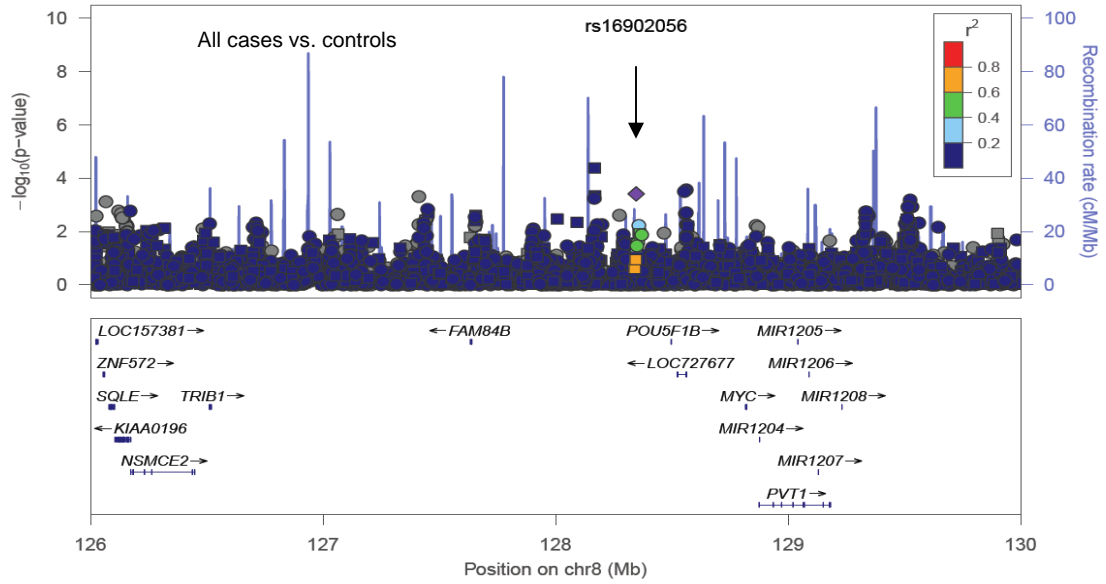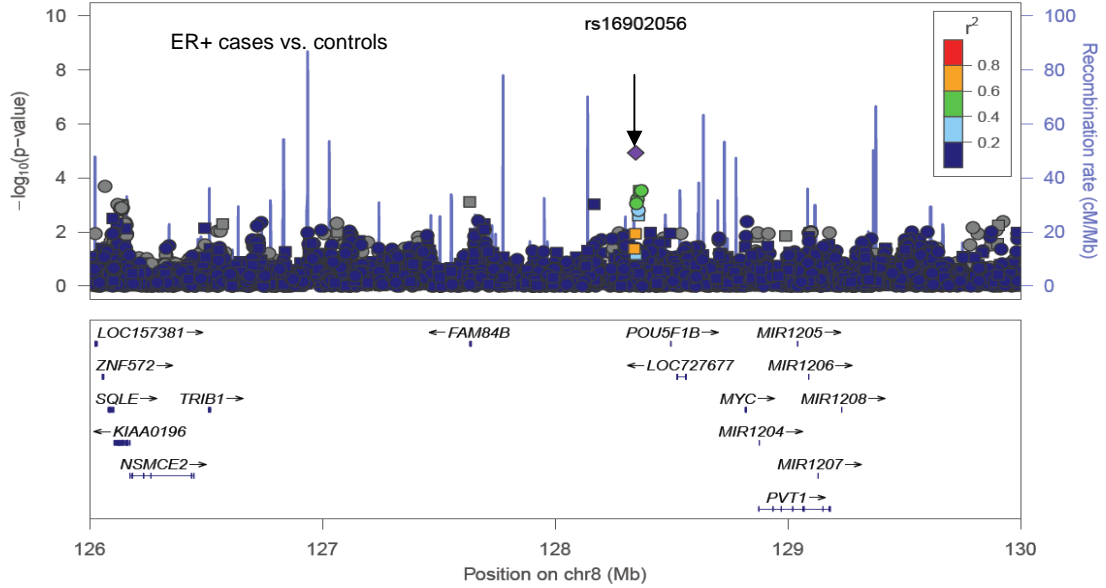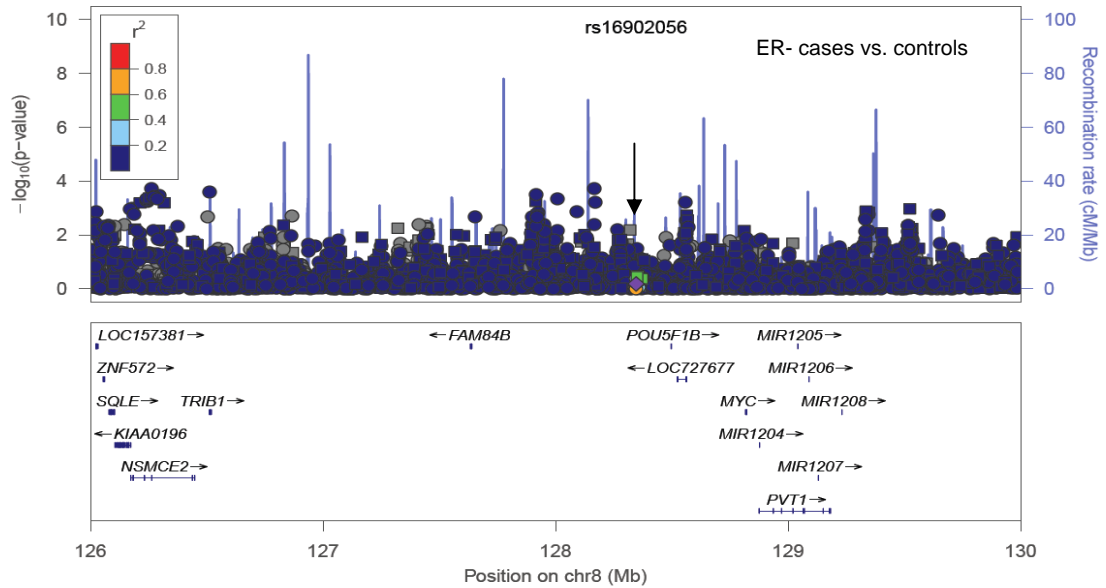

D 10q22

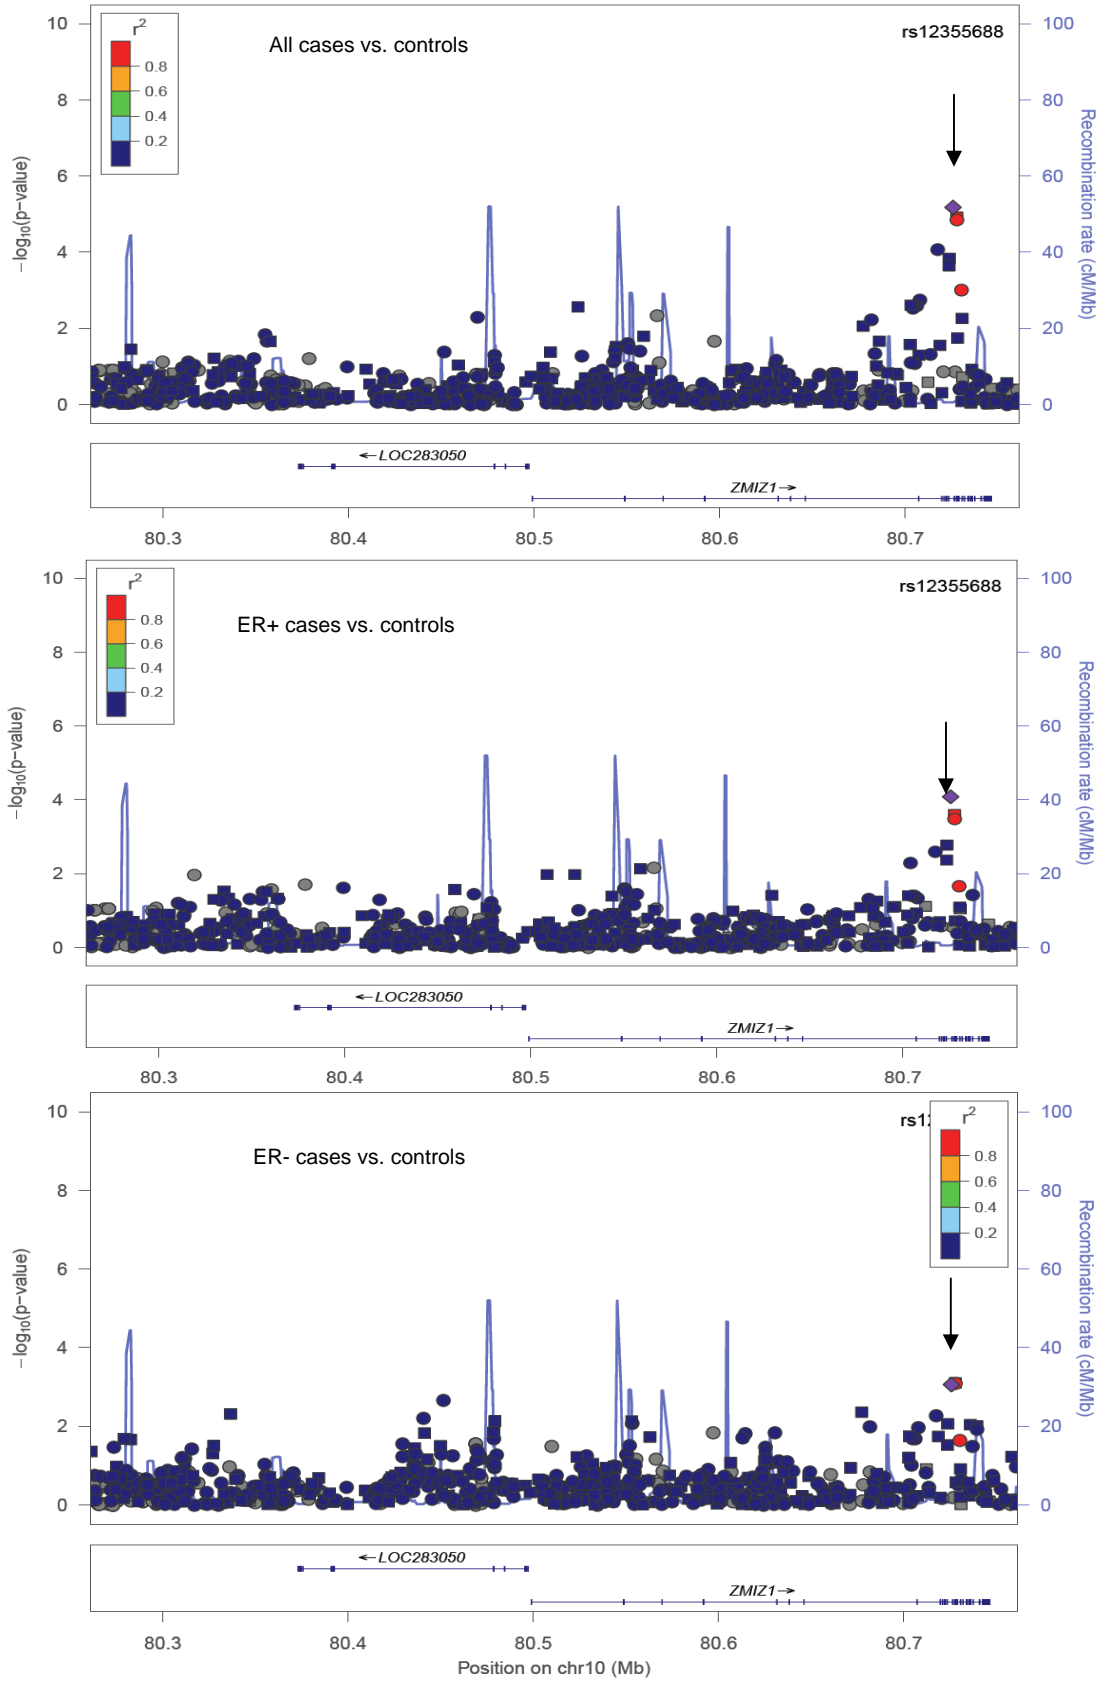

E 10q26

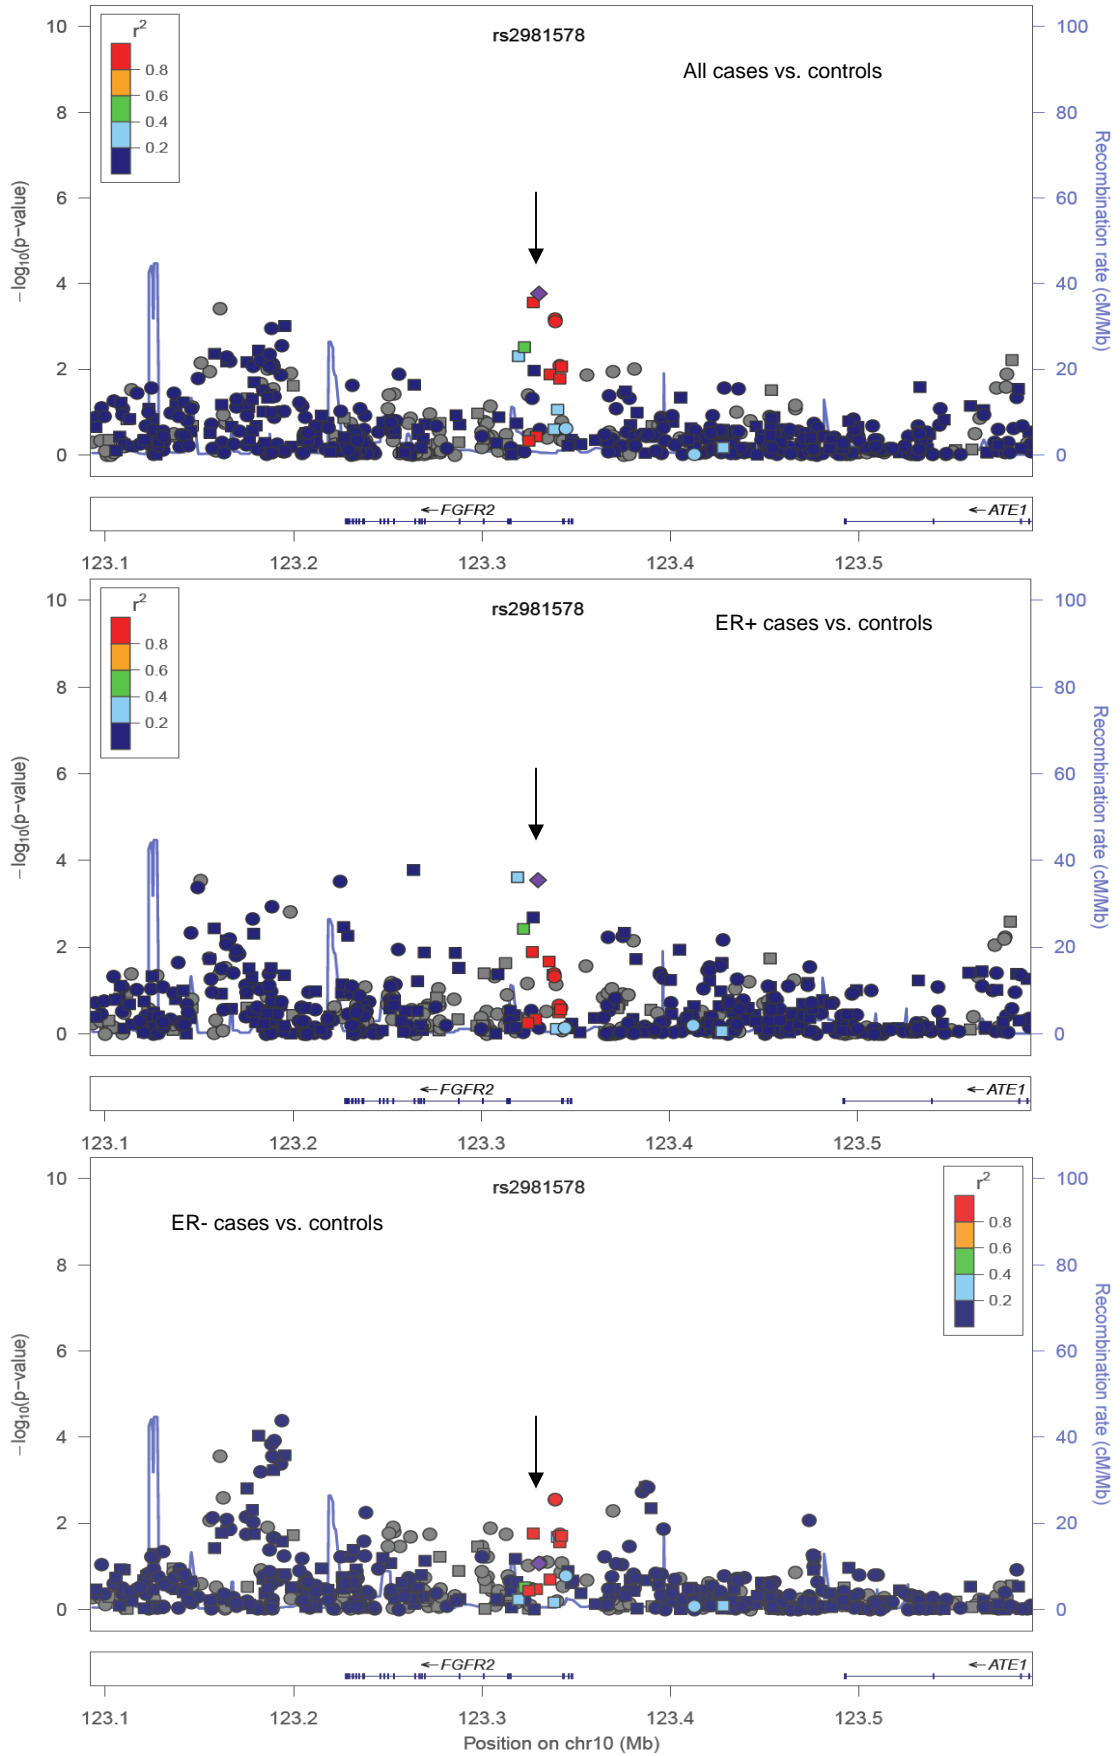



F 11q13

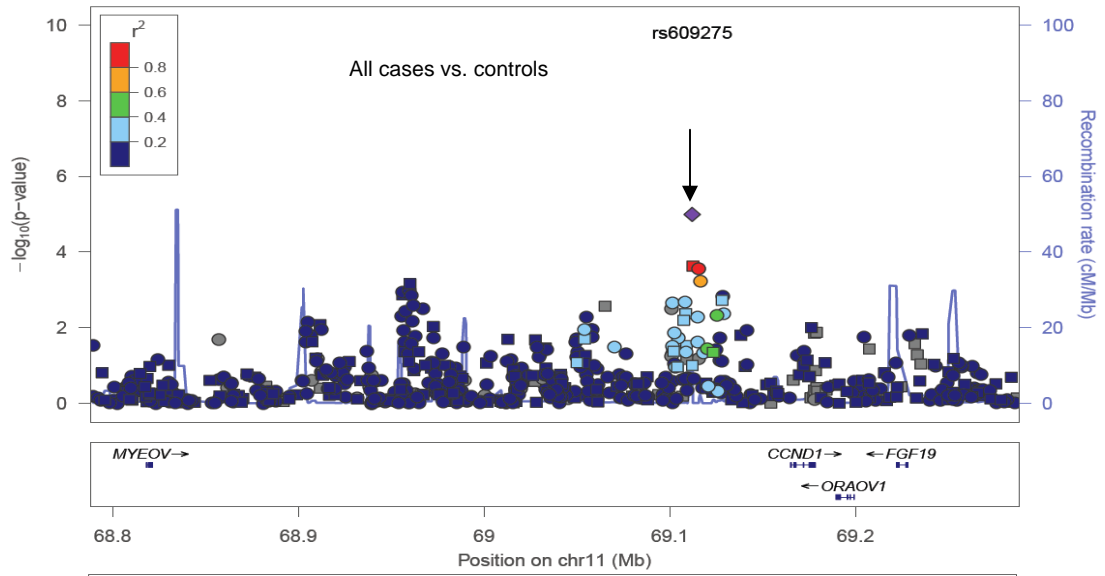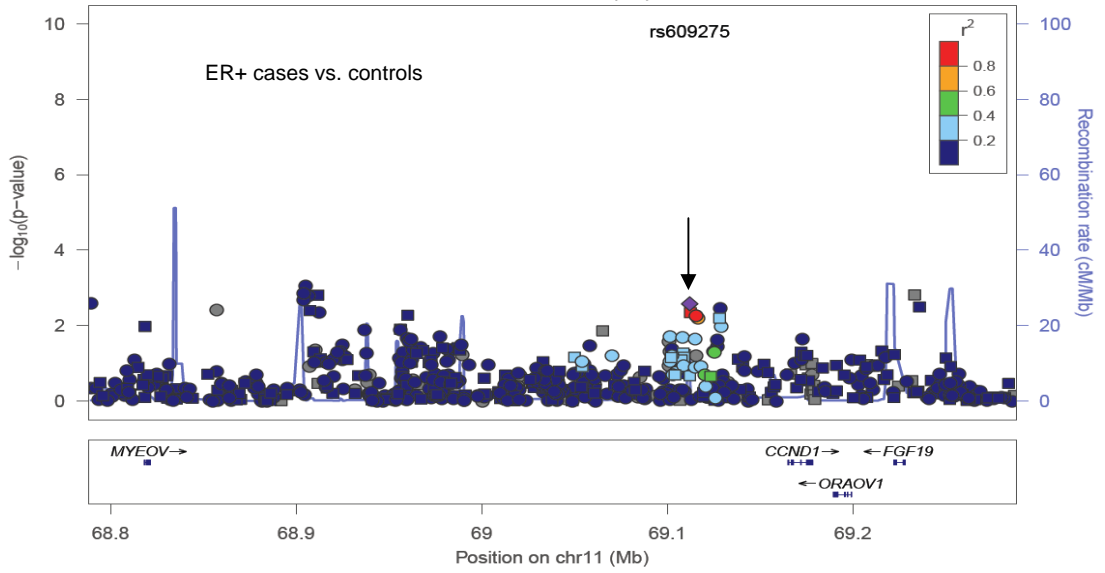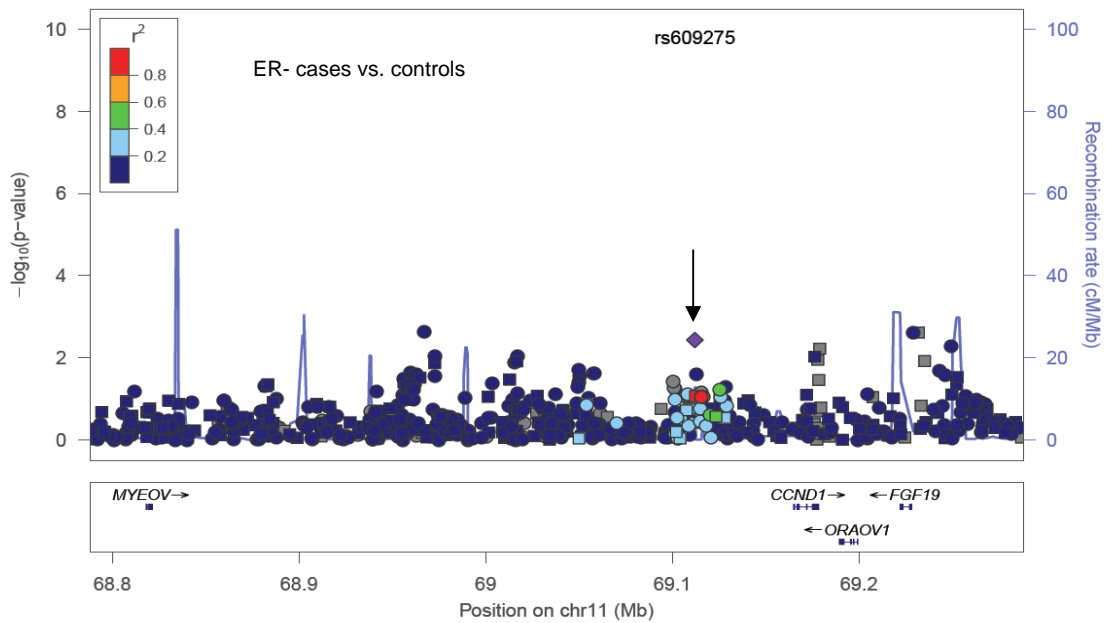

G 16q12

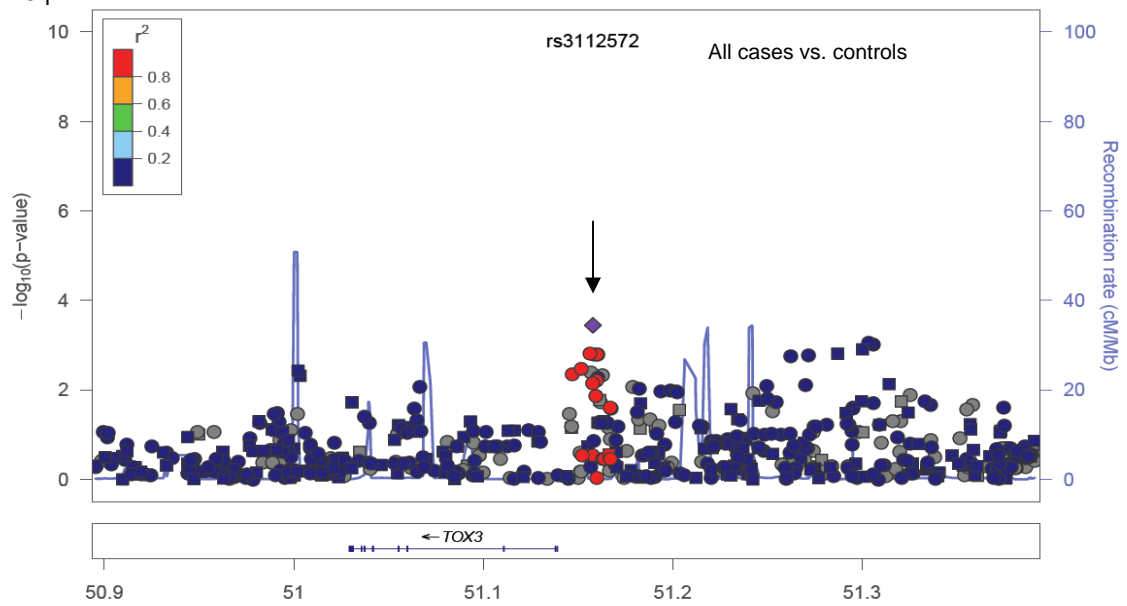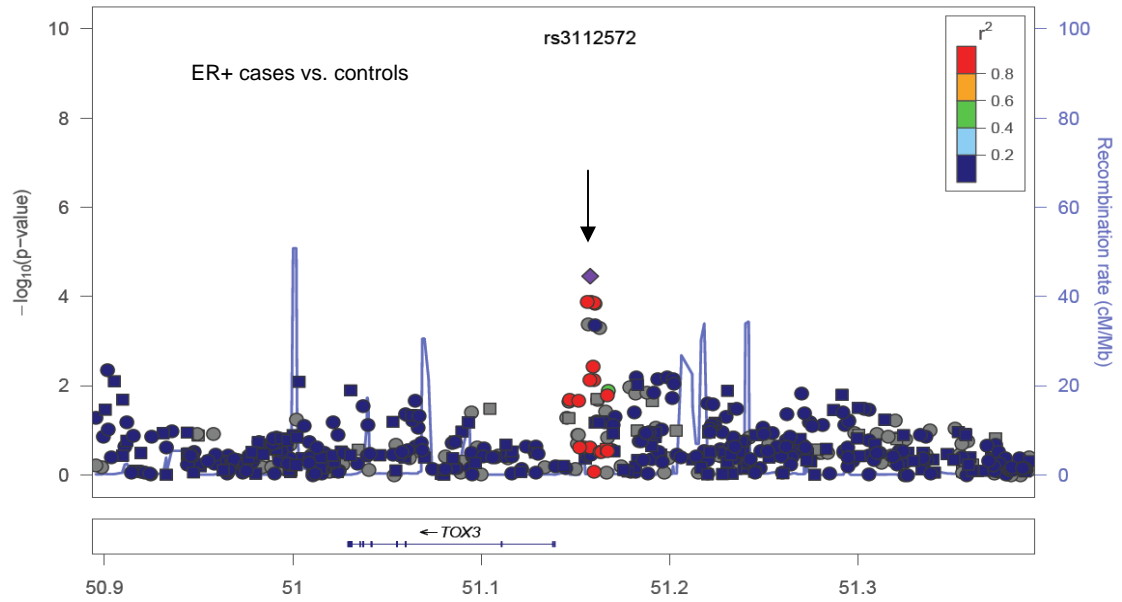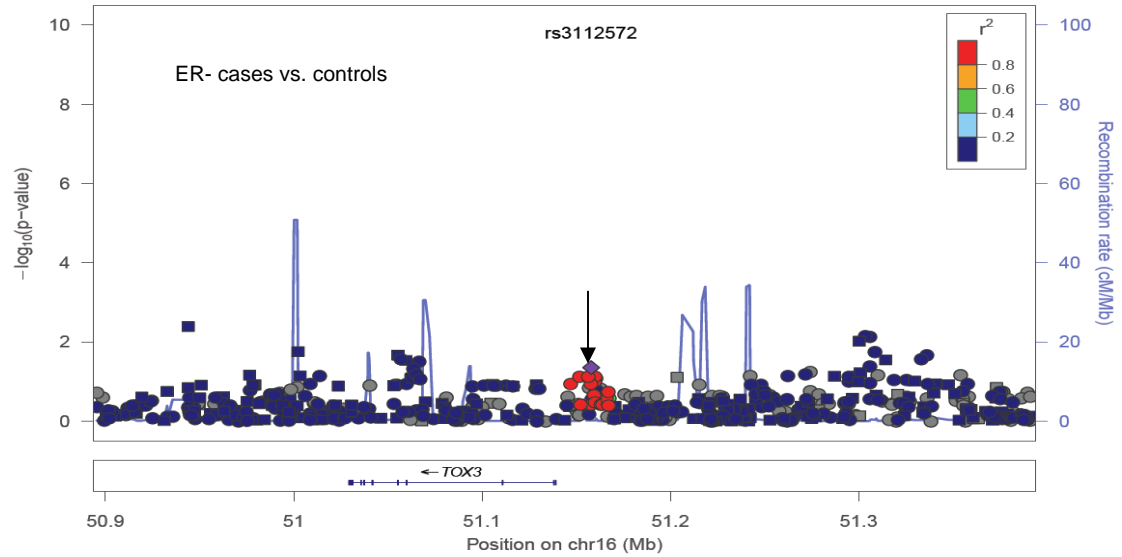

H 19p13

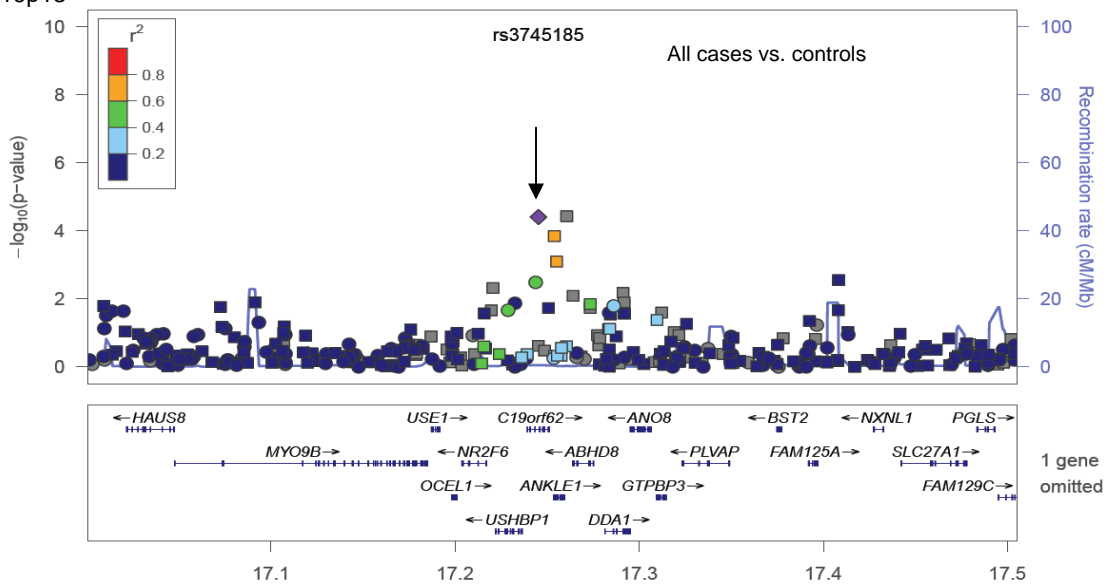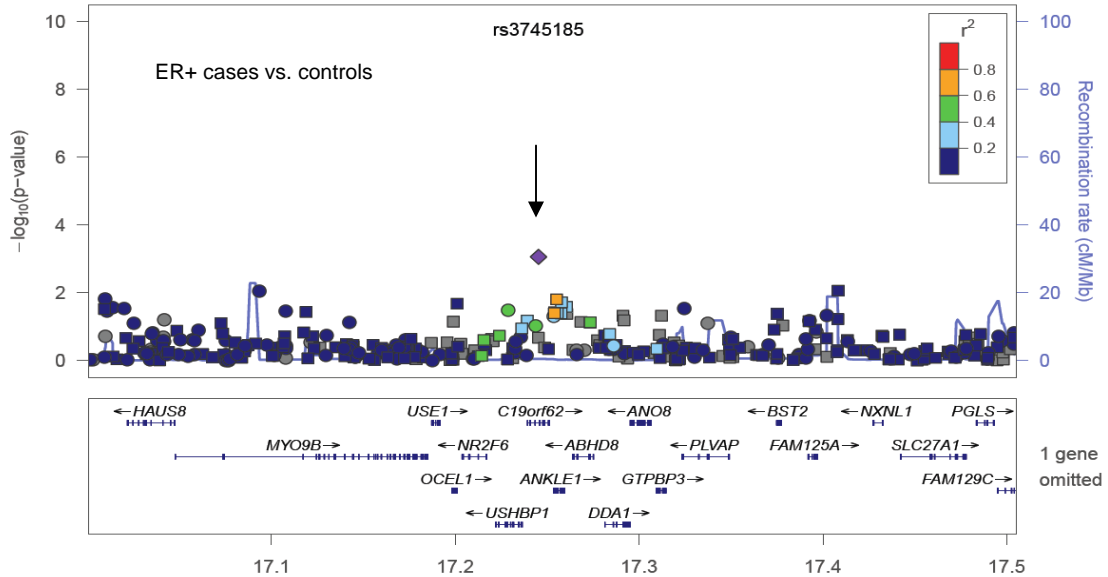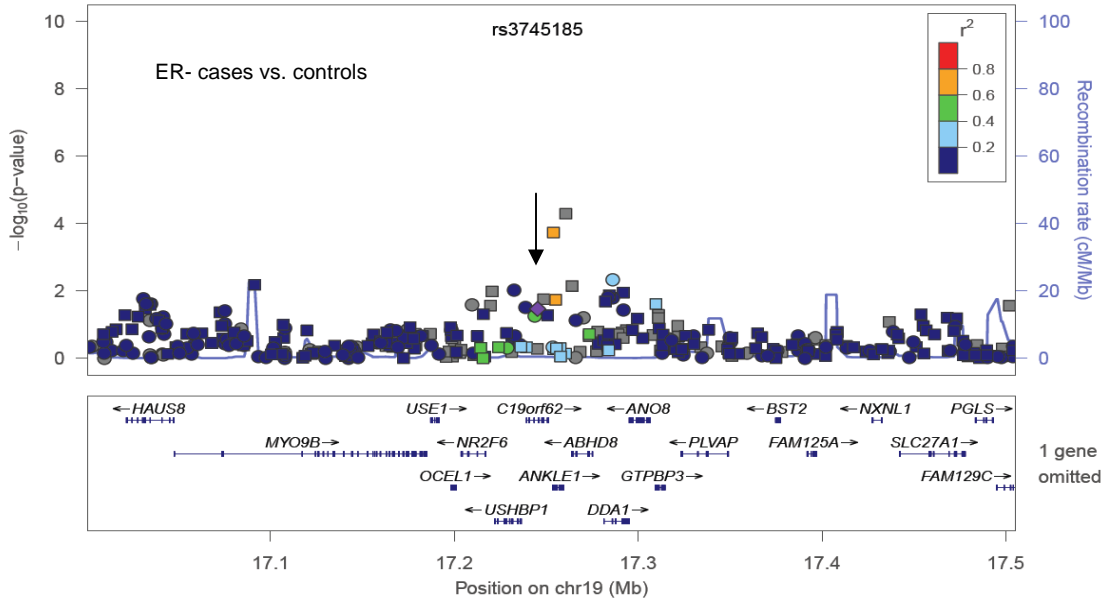

Figure S3

A 2q35

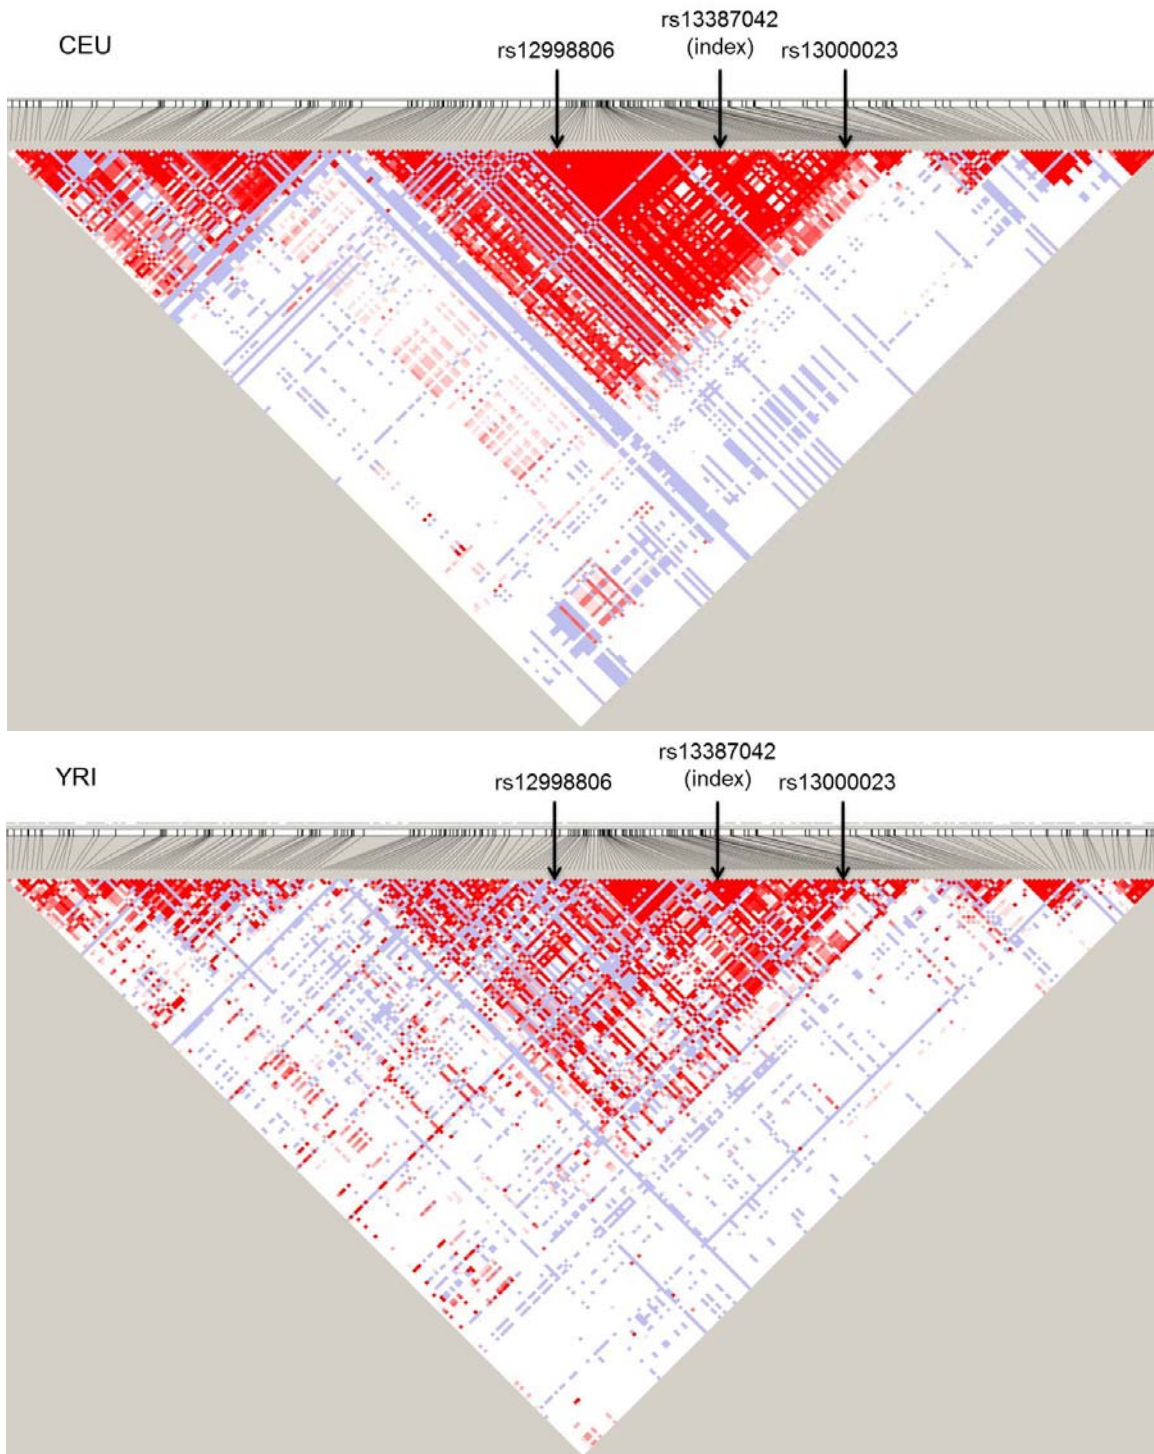

B 5q11

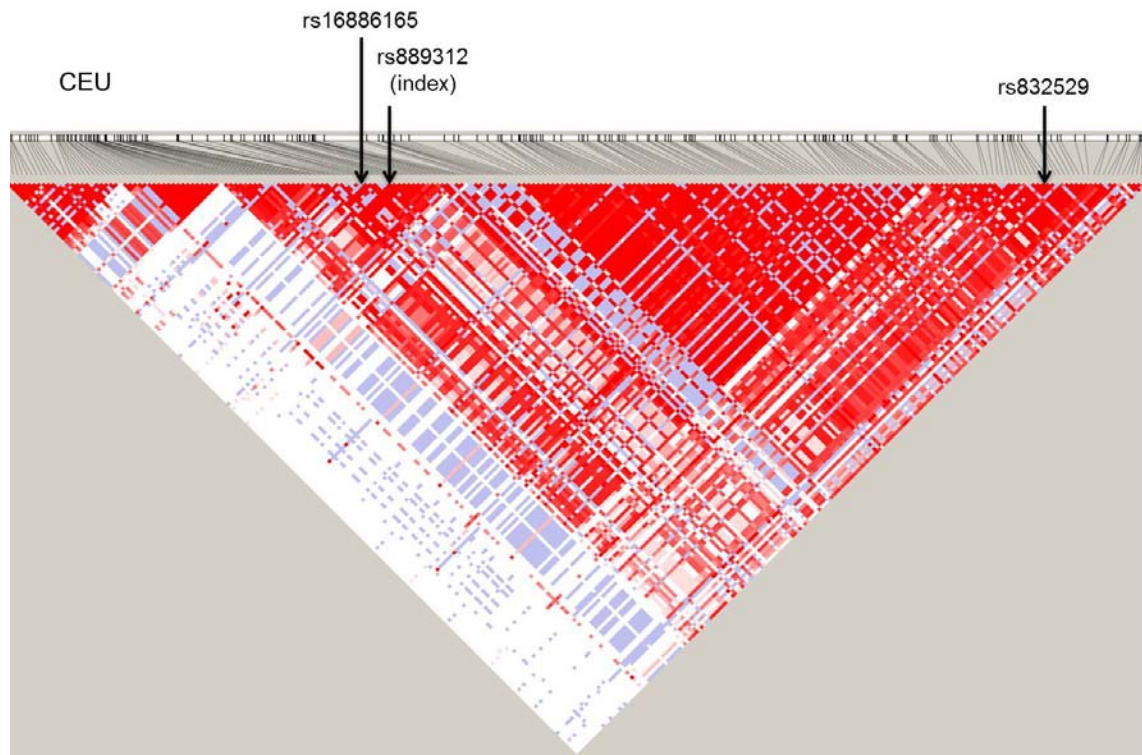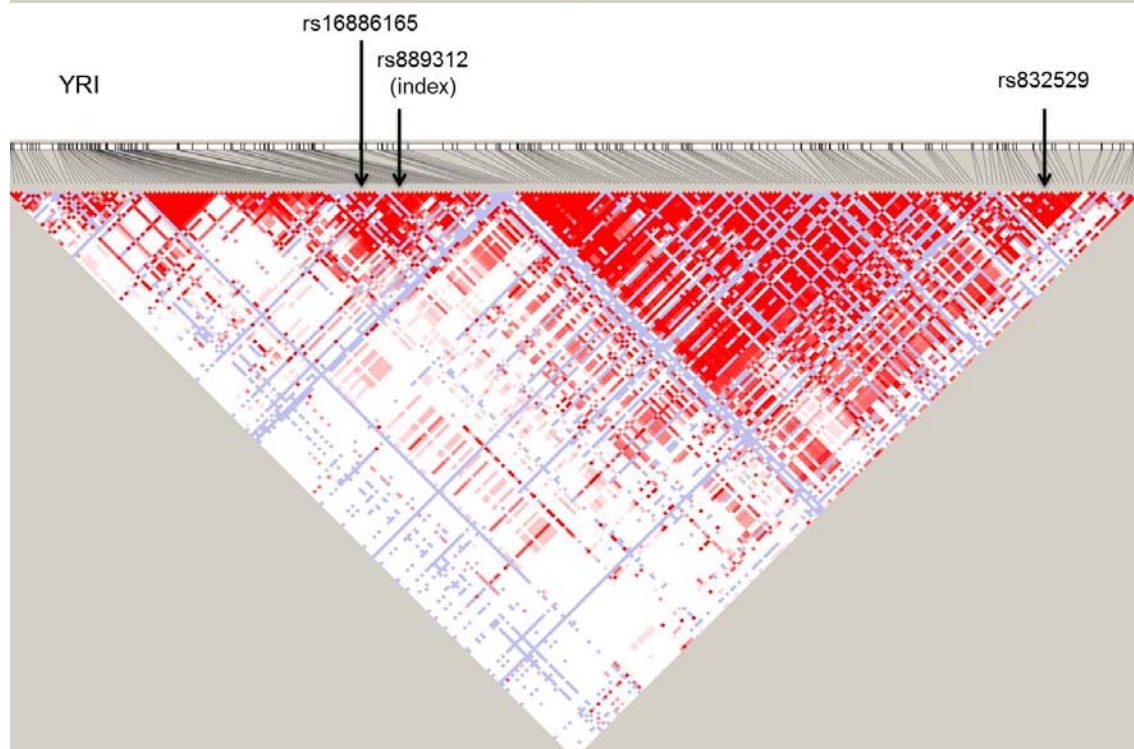

C 8q24

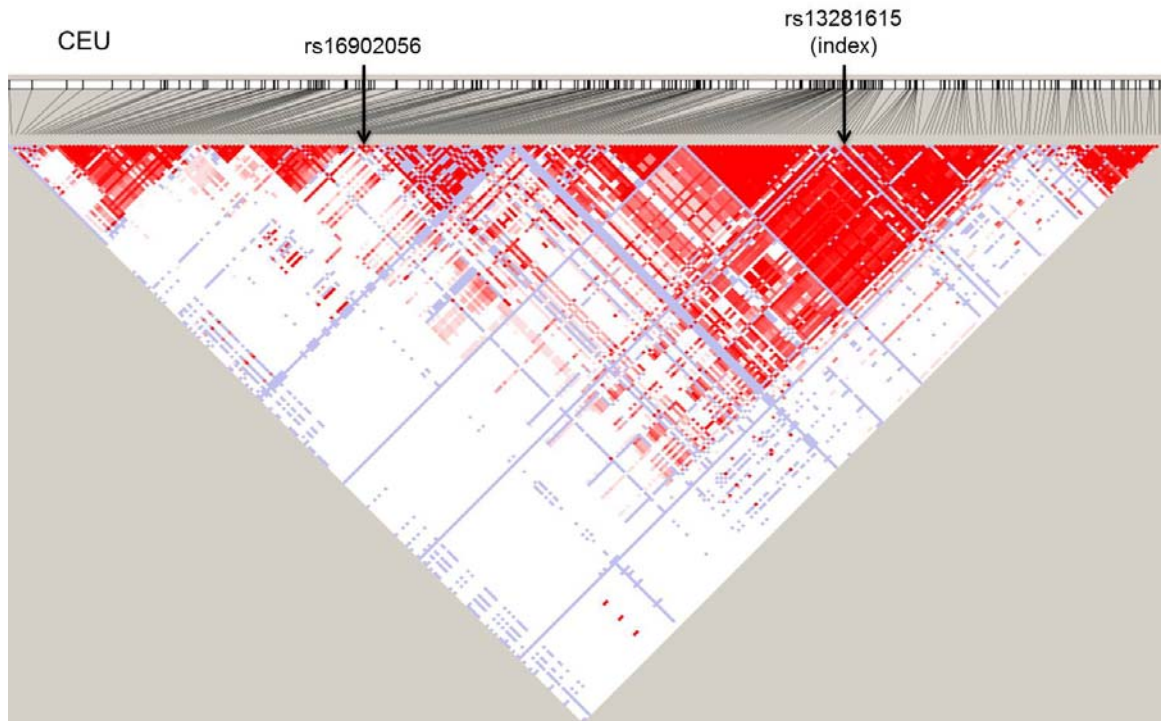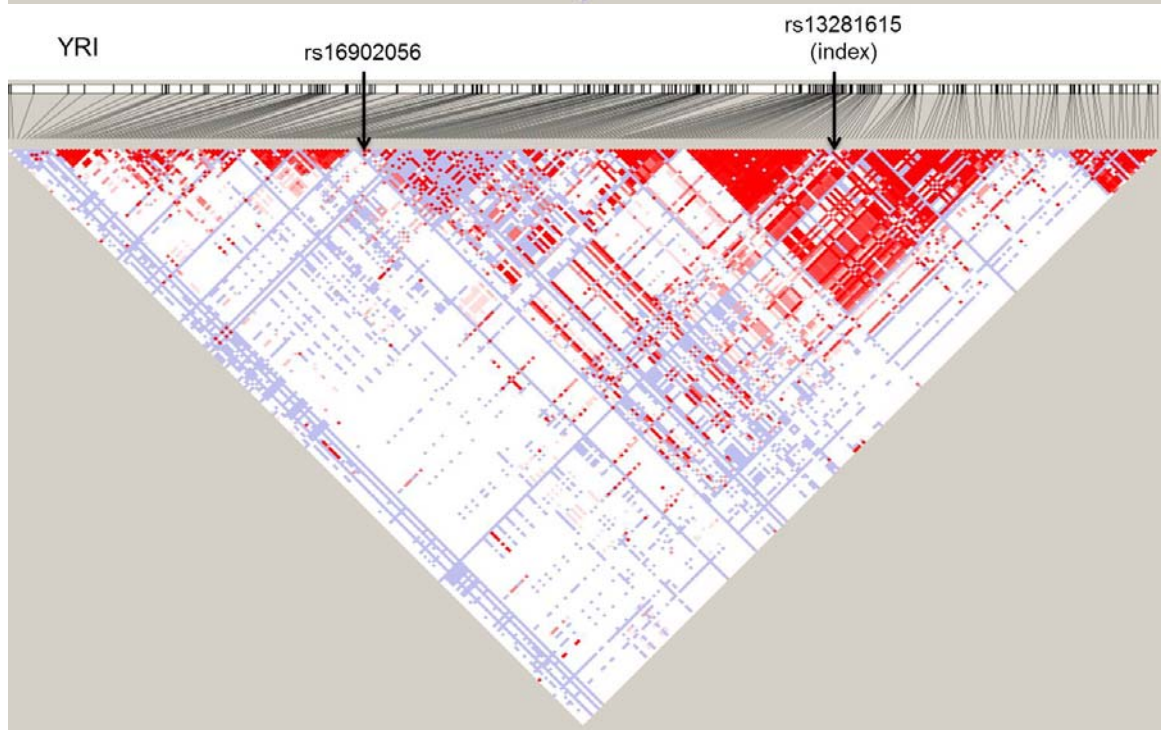

D 10q22  
rs704010  
(index)

CEU

rs12355688

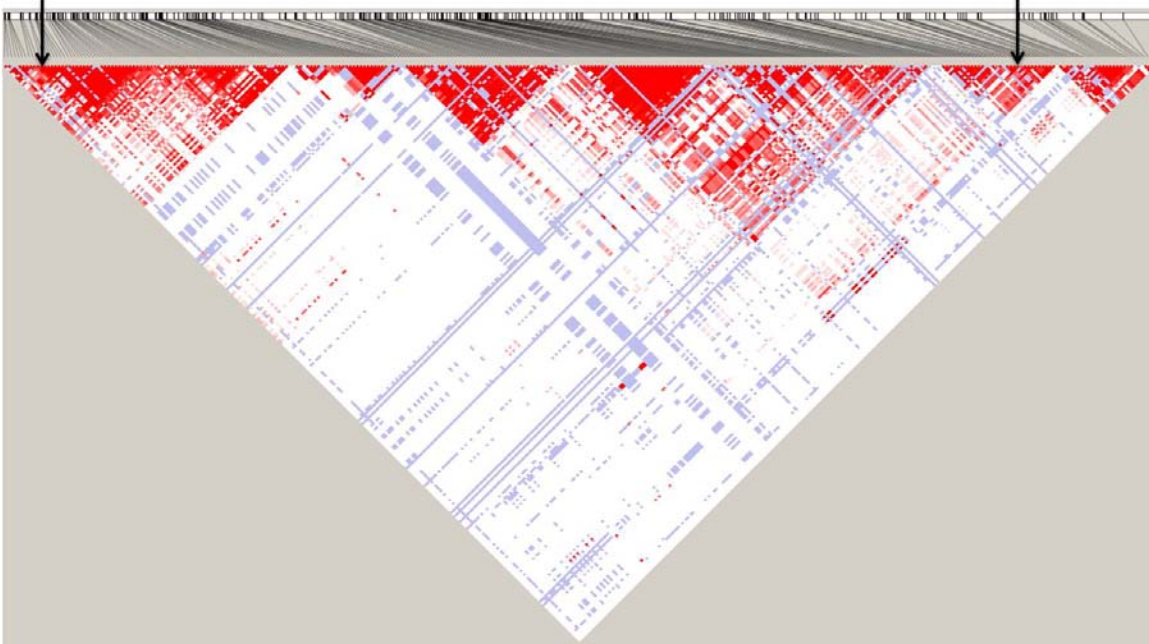

rs704010  
(index)

YRI

rs12355688

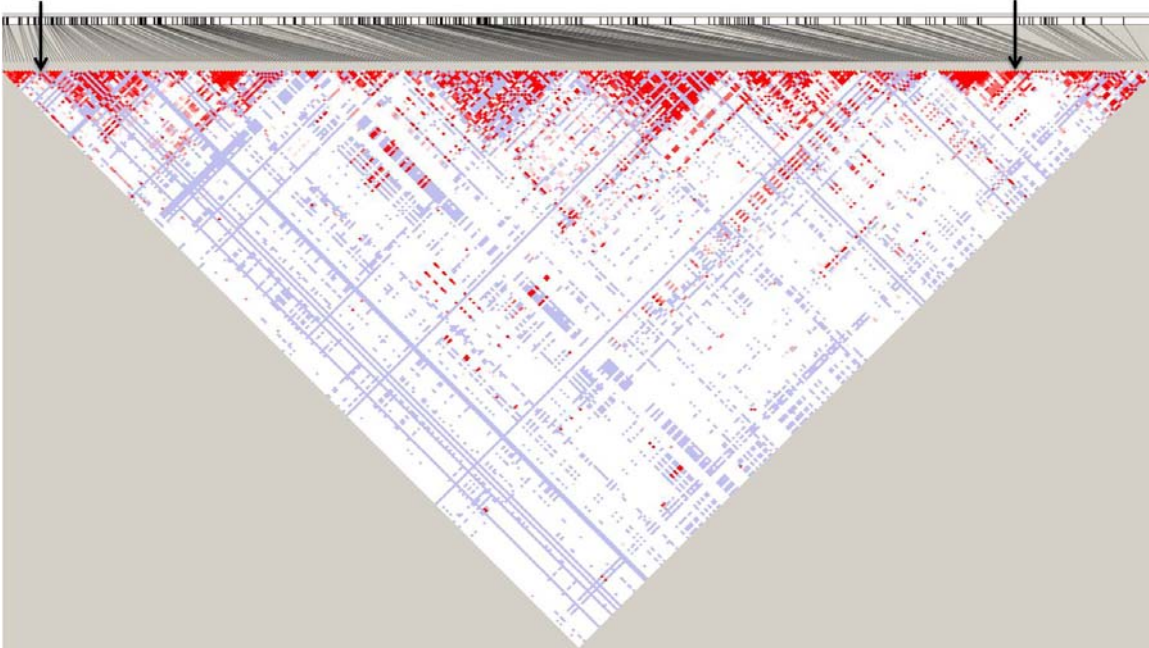

E 10q26

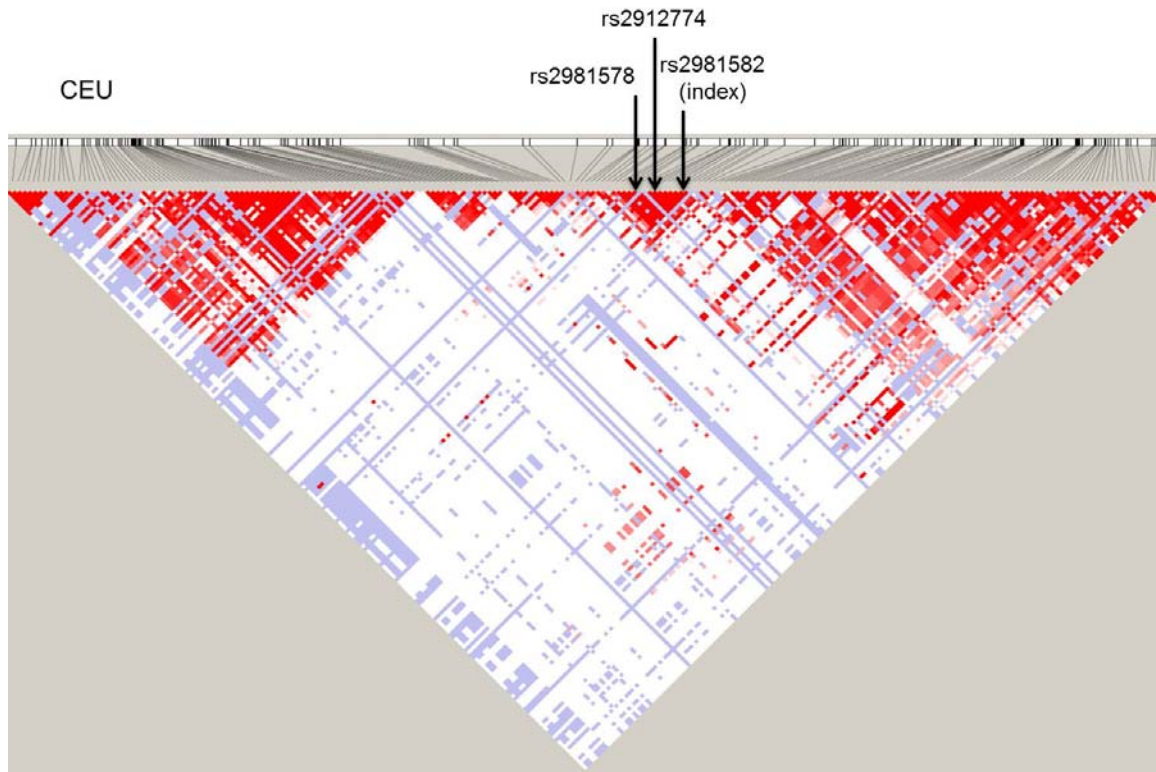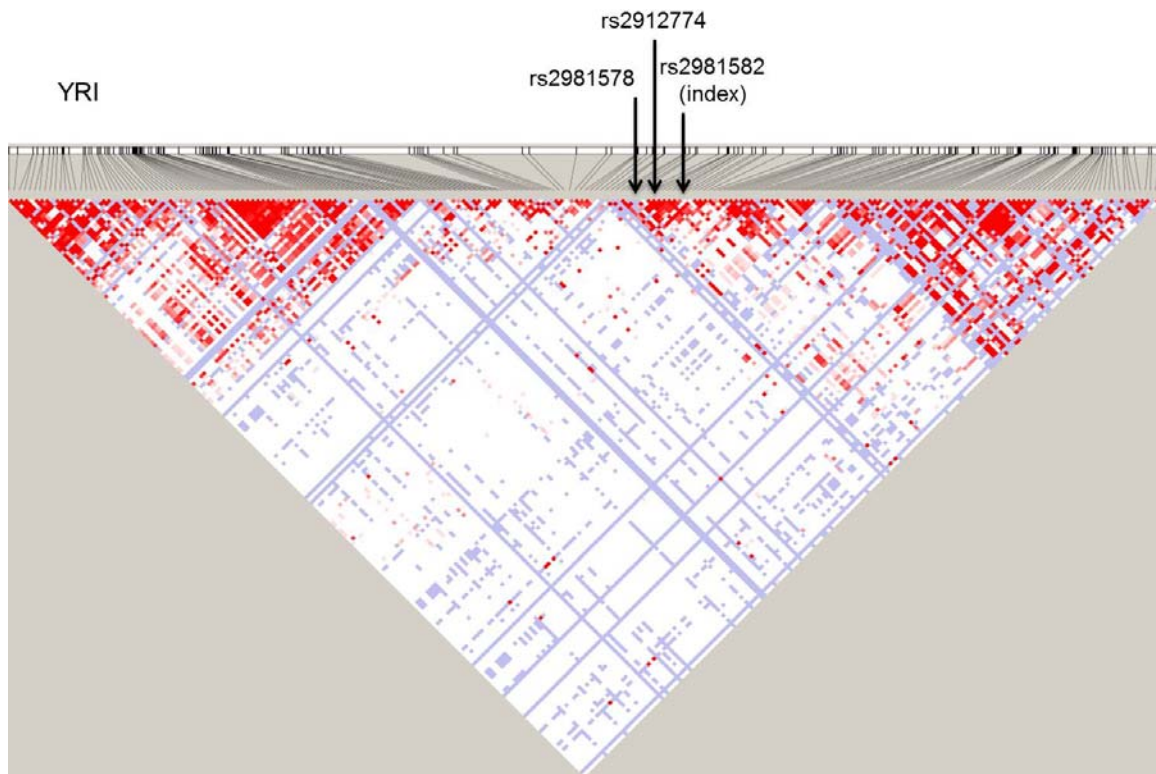



F 11p13

CEU

rs614367  
(index)

rs609275

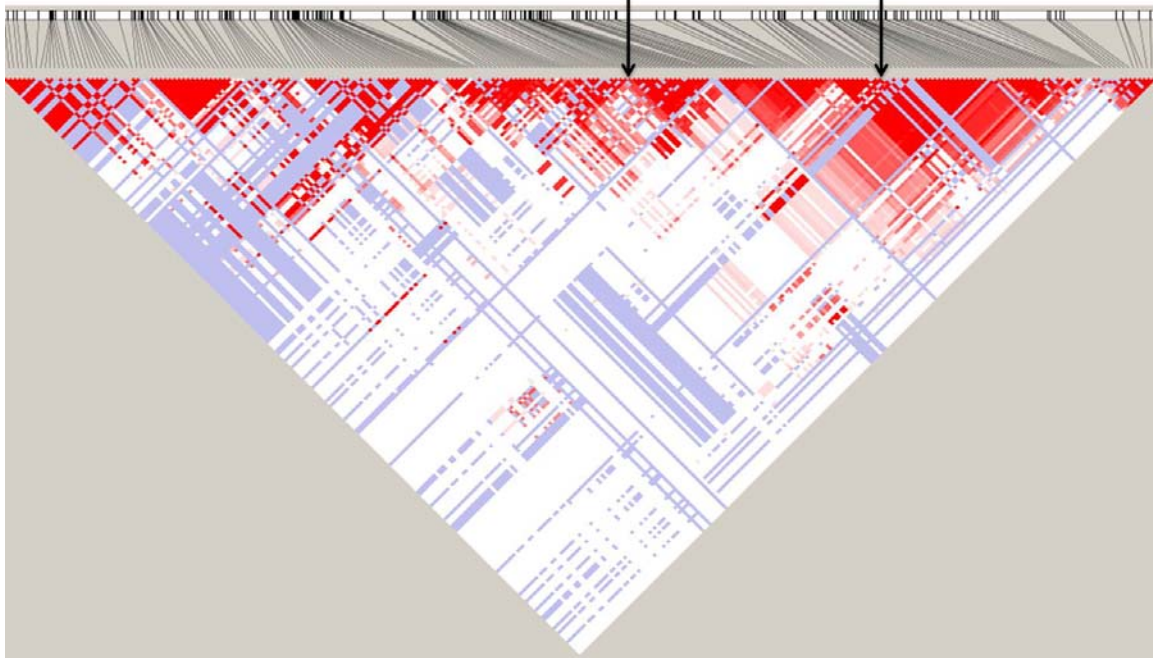

YRI

rs614367  
(index)

rs609275

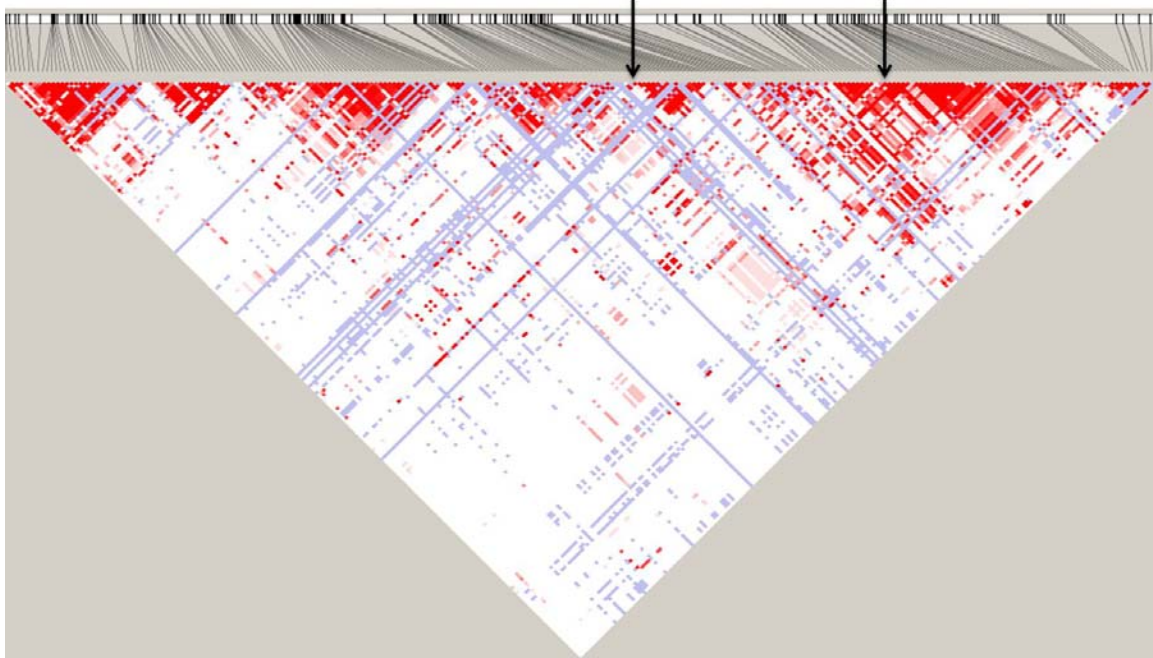

G 16q12

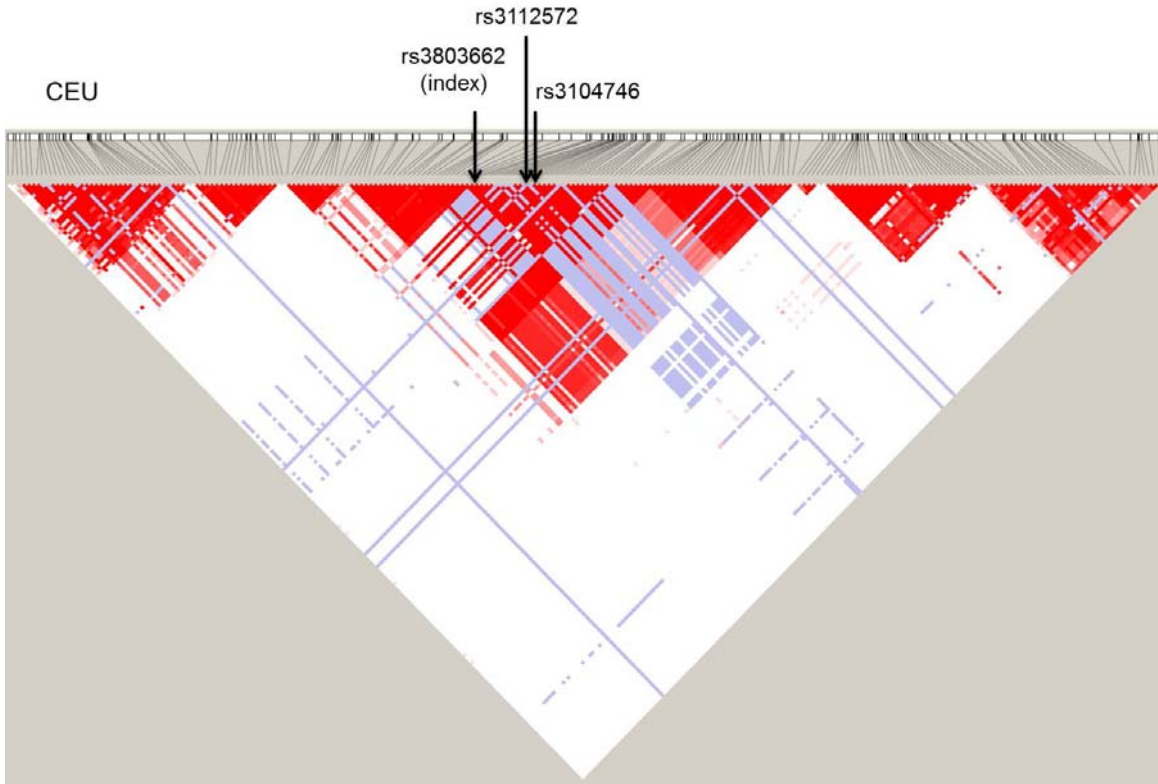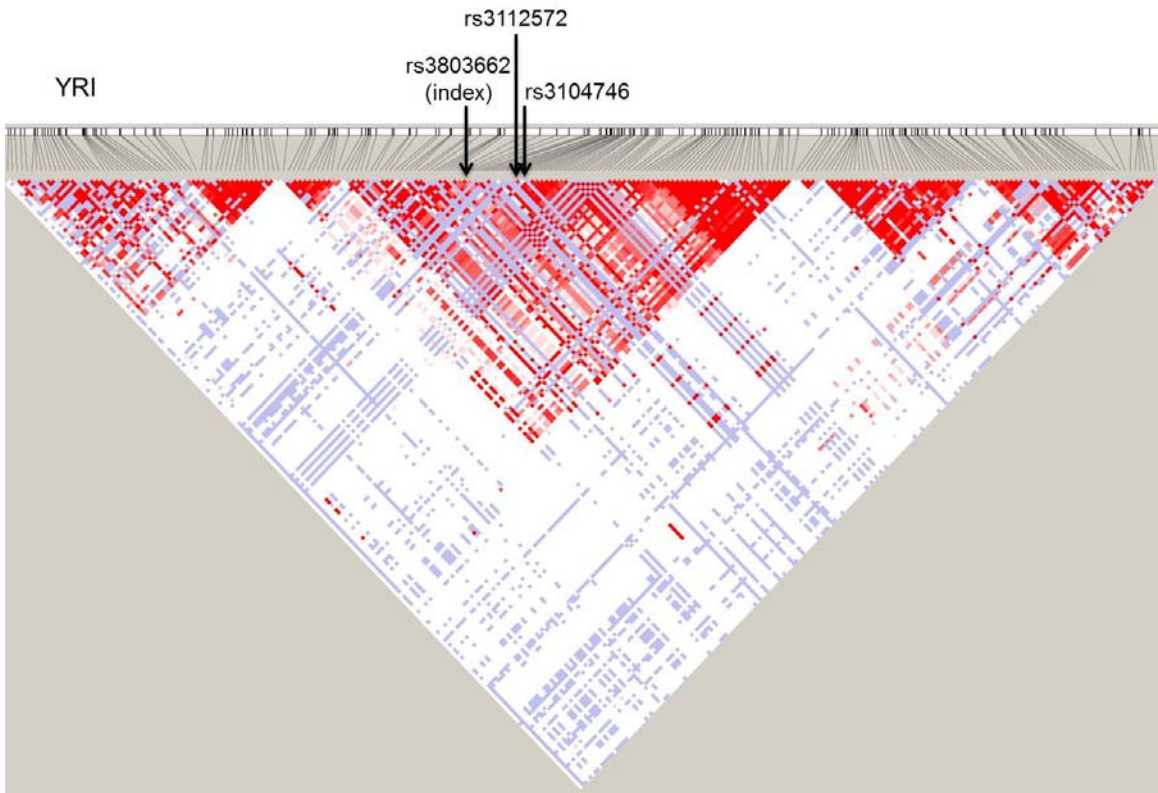

H 19p13

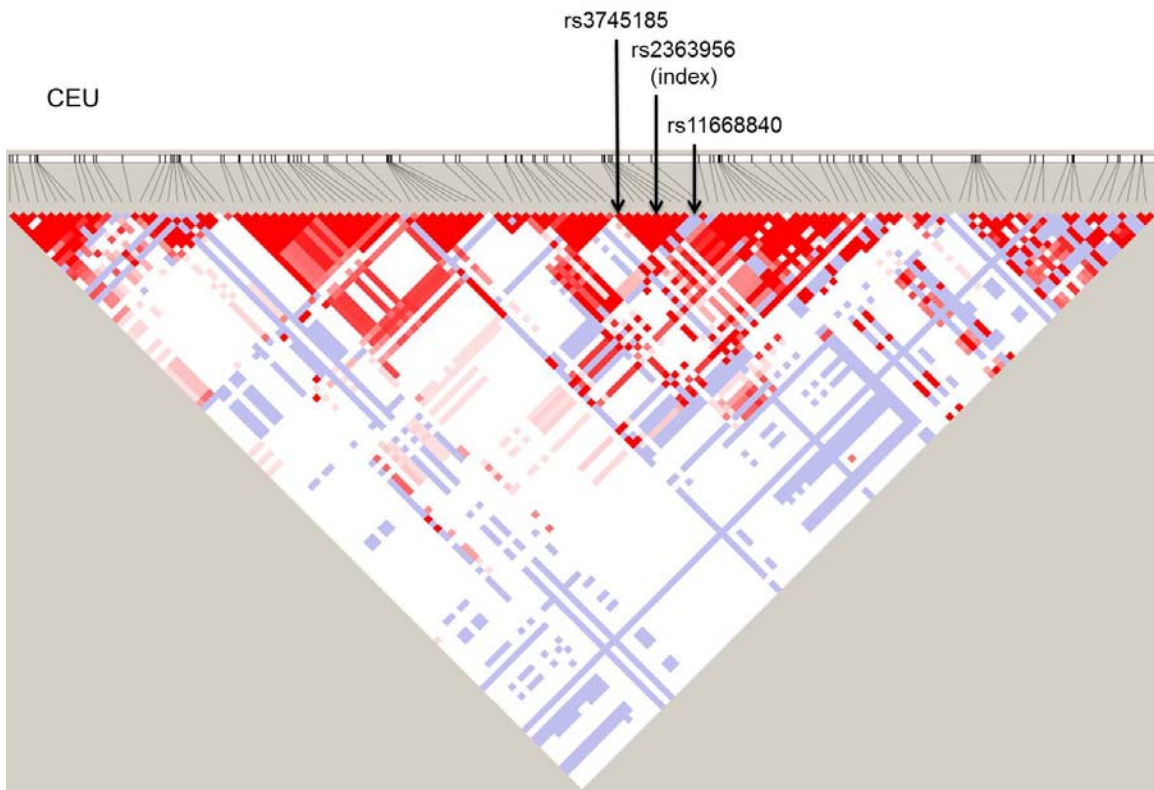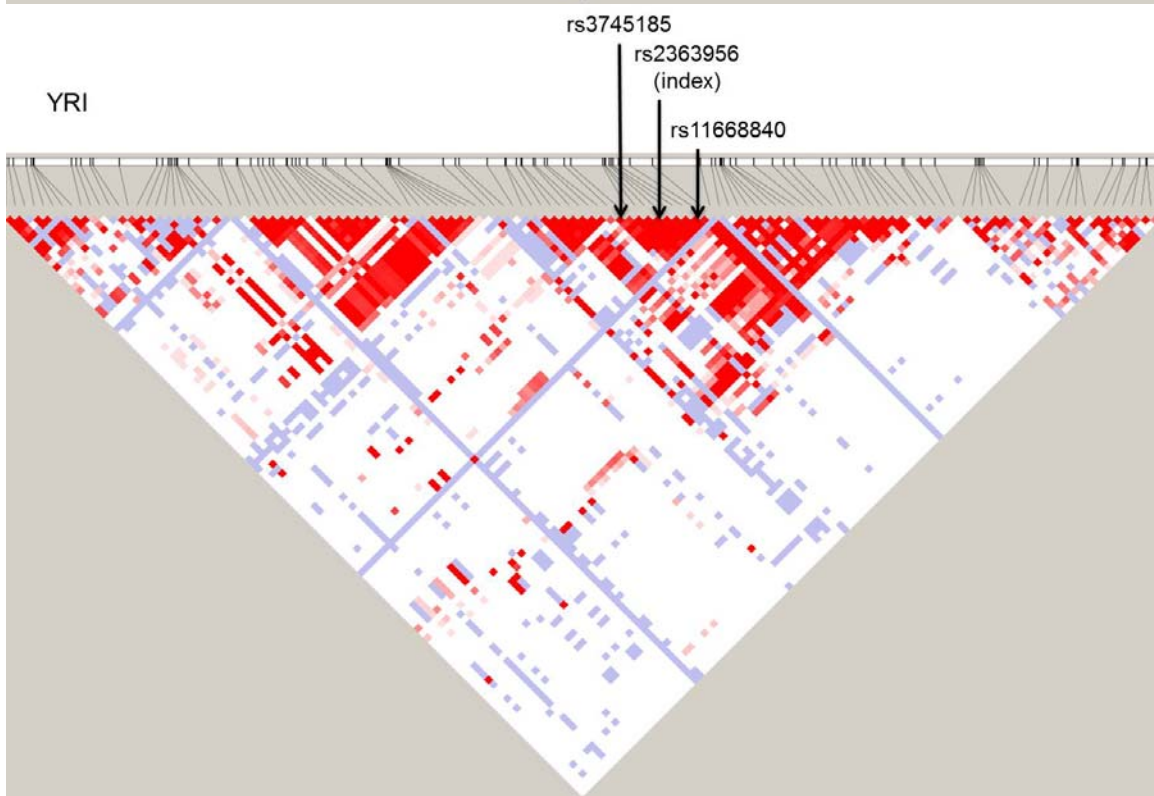

Supplement: supp_ddr367_ddr367supp_figs.pdf [file supp_ddr367_ddr367supp_figs.pdf]
